# Supplementary material
Source: PubMed Central journal article supplement (PMC6457271)
Supplement: NIHMS1021503-supplement-Table_S1.pdf [file NIHMS1021503-supplement-Table_S1.pdf]

Supplemental Table 1. The miRNA-Gene-Pathway enrichment results determined using the miRNApath package in R based on exosomal miRNAs. Pathways with an adjusted p-value < 0.02 are shown.

| Pathway ID | Adjusted P-value | Pathway Name                      |                 |                |                        |
|------------|------------------|-----------------------------------|-----------------|----------------|------------------------|
| 14         | 0.000999         | <b>KEGG_PYRIMIDINE_METABOLISM</b> |                 |                |                        |
| ASSAY ID   | Entrez Gene ID   | miRNA Name                        | miRNApath Score | miRNApath Rank | miRNA - Gene           |
| 41         | CAD              | mmu-miR-16*                       | 114.00          | 114            | mmu-miR-16* (CAD)      |
| 98         | CAD              | mmu-miR-2861                      | 8.17            | 36             | mmu-miR-2861 (CAD)     |
| 12         | CDA              | mmu-miR-103                       | 697.00          | 697            | mmu-miR-103 (CDA)      |
| 44         | CMPK2            | mmu-miR-181a                      | 93.82           | 387            | mmu-miR-181a (CMPK2)   |
| 45         | CMPK2            | mmu-miR-181b                      | 94.17           | 397            | mmu-miR-181b (CMPK2)   |
| 94         | CMPK2            | mmu-miR-24                        | 519.00          | 519            | mmu-miR-24 (CMPK2)     |
| 58         | CTPS             | mmu-miR-1931                      | 8.05            | 39             | mmu-miR-1931 (CTPS)    |
| 140        | CTPS             | mmu-miR-466g                      | 22.81           | 101            | mmu-miR-466g (CTPS)    |
| 94         | DHODH            | mmu-miR-24                        | 494.00          | 494            | mmu-miR-24 (DHODH)     |
| 195        | DTYMK            | mmu-miR-92a                       | 559.50          | 559.5          | mmu-miR-92a (DTYMK)    |
| 125        | ENTPD3           | mmu-miR-3473a                     | 319.00          | 319            | mmu-miR-3473a (ENTPD3) |
| 180        | ENTPD3           | mmu-miR-705                       | 23.24           | 138            | mmu-miR-705 (ENTPD3)   |
| 45         | ENTPD6           | mmu-miR-181b                      | 27.15           | 105            | mmu-miR-181b (ENTPD6)  |
| 195        | ITPA             | mmu-miR-92a                       | 369.00          | 369            | mmu-miR-92a (ITPA)     |
| 41         | NME3             | mmu-miR-16*                       | 213.50          | 213.5          | mmu-miR-16* (NME3)     |
| 1          | NME4             | mmu-let-7a                        | 12.52           | 35             | mmu-let-7a (NME4)      |
| 3          | NME4             | mmu-let-7b                        | 13.14           | 32             | mmu-let-7b (NME4)      |
| 4          | NME4             | mmu-let-7c                        | 13.01           | 37             | mmu-let-7c (NME4)      |
| 6          | NME4             | mmu-let-7d                        | 3.68            | 6              | mmu-let-7d (NME4)      |
| 7          | NME4             | mmu-let-7e                        | 13.23           | 39             | mmu-let-7e (NME4)      |
| 10         | NME4             | mmu-let-7i                        | 13.02           | 35             | mmu-let-7i (NME4)      |
| 41         | NME4             | mmu-miR-16*                       | 293.00          | 293            | mmu-miR-16* (NME4)     |
| 189        | NME4             | mmu-miR-762                       | 4.45            | 4              | mmu-miR-762 (NME4)     |
| 1          | NME6             | mmu-let-7a                        | 20.22           | 82             | mmu-let-7a (NME6)      |
| 3          | NME6             | mmu-let-7b                        | 22.34           | 97             | mmu-let-7b (NME6)      |
| 4          | NME6             | mmu-let-7c                        | 20.52           | 81             | mmu-let-7c (NME6)      |
| 6          | NME6             | mmu-let-7d                        | 6.31            | 21             | mmu-let-7d (NME6)      |
| 7          | NME6             | mmu-let-7e                        | 21.42           | 93             | mmu-let-7e (NME6)      |
| 10         | NME6             | mmu-let-7i                        | 16.39           | 54             | mmu-let-7i (NME6)      |
| 94         | NT5C1A           | mmu-miR-24                        | 123.50          | 123.5          | mmu-miR-24 (NT5C1A)    |
| 122        | NT5C3            | mmu-miR-3470a                     | 3.15            | 12             | mmu-miR-3470a (NT5C3)  |
| 195        | NT5M             | mmu-miR-92a                       | 459.00          | 459            | mmu-miR-92a (NT5M)     |
| 94         | POLA2            | mmu-miR-24                        | 127.50          | 127.5          | mmu-miR-24 (POLA2)     |
| 73         | POLD3            | mmu-miR-19b                       | 332.00          | 332            | mmu-miR-19b (POLD3)    |

|     |        |                 |        |       |                          |
|-----|--------|-----------------|--------|-------|--------------------------|
| 74  | POLD3  | mmu-miR-207     | 6.75   | 39    | mmu-miR-207 (POLD3)      |
| 73  | POLR1C | mmu-miR-19b     | 153.00 | 153   | mmu-miR-19b (POLR1C)     |
| 12  | POLR2A | mmu-miR-103     | 220.50 | 220.5 | mmu-miR-103 (POLR2A)     |
| 41  | POLR2B | mmu-miR-16*     | 114.00 | 114   | mmu-miR-16* (POLR2B)     |
| 182 | POLR2D | mmu-miR-709     | 27.14  | 166   | mmu-miR-709 (POLR2D)     |
| 94  | POLR2G | mmu-miR-24      | 20.50  | 20.5  | mmu-miR-24 (POLR2G)      |
| 12  | POLR2H | mmu-miR-103     | 626.50 | 626.5 | mmu-miR-103 (POLR2H)     |
| 40  | POLR2H | mmu-miR-15b     | 9.88   | 13    | mmu-miR-15b (POLR2H)     |
| 73  | POLR2L | mmu-miR-19b     | 509.50 | 509.5 | mmu-miR-19b (POLR2L)     |
| 94  | POLR2L | mmu-miR-24      | 324.00 | 324   | mmu-miR-24 (POLR2L)      |
| 41  | POLR3C | mmu-miR-16*     | 232.00 | 232   | mmu-miR-16* (POLR3C)     |
| 12  | POLR3D | mmu-miR-103     | 595.00 | 595   | mmu-miR-103 (POLR3D)     |
| 41  | POLR3D | mmu-miR-16*     | 119.00 | 119   | mmu-miR-16* (POLR3D)     |
| 40  | POLR3F | mmu-miR-15b     | 50.66  | 253   | mmu-miR-15b (POLR3F)     |
| 42  | POLR3F | mmu-miR-16      | 47.55  | 240   | mmu-miR-16 (POLR3F)      |
| 75  | POLR3G | mmu-miR-20a     | 43.81  | 195   | mmu-miR-20a (POLR3G)     |
| 197 | POLR3G | mmu-miR-93      | 41.21  | 183   | mmu-miR-93 (POLR3G)      |
| 12  | PRIM2  | mmu-miR-103     | 35.00  | 35    | mmu-miR-103 (PRIM2)      |
| 1   | RRM2   | mmu-let-7a      | 70.21  | 308   | mmu-let-7a (RRM2)        |
| 3   | RRM2   | mmu-let-7b      | 70.15  | 313   | mmu-let-7b (RRM2)        |
| 4   | RRM2   | mmu-let-7c      | 71.61  | 323   | mmu-let-7c (RRM2)        |
| 7   | RRM2   | mmu-let-7e      | 62.88  | 289   | mmu-let-7e (RRM2)        |
| 10  | RRM2   | mmu-let-7i      | 41.52  | 217   | mmu-let-7i (RRM2)        |
| 13  | RRM2   | mmu-miR-106a    | 25.89  | 108   | mmu-miR-106a (RRM2)      |
| 75  | RRM2   | mmu-miR-20a     | 118.61 | 456   | mmu-miR-20a (RRM2)       |
| 197 | RRM2   | mmu-miR-93      | 79.13  | 362   | mmu-miR-93 (RRM2)        |
| 125 | TK1    | mmu-miR-3473a   | 592.00 | 592   | mmu-miR-3473a (TK1)      |
| 171 | TK2    | mmu-miR-671-5p  | 15.68  | 74    | mmu-miR-671-5p (TK2)     |
| 24  | TXNRD1 | mmu-miR-125b-5p | 85.04  | 311   | mmu-miR-125b-5p (TXNRD1) |
| 12  | UCK2   | mmu-miR-103     | 211.00 | 211   | mmu-miR-103 (UCK2)       |
| 195 | UPB1   | mmu-miR-92a     | 646.00 | 646   | mmu-miR-92a (UPB1)       |
| 30  | UPP1   | mmu-miR-138*    | 74.00  | 74    | mmu-miR-138* (UPP1)      |
| 195 | UPP2   | mmu-miR-92a     | 410.00 | 410   | mmu-miR-92a (UPP2)       |

| Pathway ID | Adjusted P-value | Pathway Name                 |                 |                |                      |
|------------|------------------|------------------------------|-----------------|----------------|----------------------|
| 433        | 0.000999         | ST_TYPE_I_INTERFERON_PATHWAY |                 |                |                      |
| ASSAY ID   | Entrez Gene ID   | miRNA Name                   | miRNApath Score | miRNApath Rank | miRNA - Gene         |
| 13         | JAK1             | mmu-miR-106a                 | 14.51           | 57             | mmu-miR-106a (JAK1)  |
| 43         | JAK1             | mmu-miR-17                   | 42.24           | 185            | mmu-miR-17 (JAK1)    |
| 75         | JAK1             | mmu-miR-20a                  | 34.05           | 133            | mmu-miR-20a (JAK1)   |
| 125        | JAK1             | mmu-miR-3473a                | 645.00          | 645            | mmu-miR-3473a (JAK1) |
| 1          | PTPRU            | mmu-let-7a                   | 42.57           | 219            | mmu-let-7a (PTPRU)   |
| 73         | PTPRU            | mmu-miR-19b                  | 665.00          | 665            | mmu-miR-19b (PTPRU)  |
| 1          | TYK2             | mmu-let-7a                   | 8.27            | 12             | mmu-let-7a (TYK2)    |
| 3          | TYK2             | mmu-let-7b                   | 9.28            | 22             | mmu-let-7b (TYK2)    |
| 4          | TYK2             | mmu-let-7c                   | 8.28            | 13             | mmu-let-7c (TYK2)    |
| 6          | TYK2             | mmu-let-7d                   | 4.99            | 15             | mmu-let-7d (TYK2)    |
| 7          | TYK2             | mmu-let-7e                   | 7.03            | 15             | mmu-let-7e (TYK2)    |
| 10         | TYK2             | mmu-let-7i                   | 8.61            | 17             | mmu-let-7i (TYK2)    |

| Pathway ID | Adjusted P-value | Pathway Name                                                                        |                 |                |                        |
|------------|------------------|-------------------------------------------------------------------------------------|-----------------|----------------|------------------------|
| 675        | 0.000999         | REACTOME_NEF_MEDIATED_DOWNREGULATION_OF_MHC_CLASS_I_COMPLEX_CELL_SURFACE_EXPRESSION |                 |                |                        |
| ASSAY ID   | Entrez Gene ID   | miRNA Name                                                                          | miRNApath Score | miRNApath Rank | miRNA - Gene           |
| 18         | AP1G1            | mmu-miR-1187                                                                        | 5.82            | 17             | mmu-miR-1187 (AP1G1)   |
| 56         | AP1G1            | mmu-miR-191                                                                         | 2.81            | 20             | mmu-miR-191 (AP1G1)    |
| 180        | AP1G1            | mmu-miR-705                                                                         | 4.49            | 4              | mmu-miR-705 (AP1G1)    |
| 12         | AP1M1            | mmu-miR-103                                                                         | 564.00          | 564            | mmu-miR-103 (AP1M1)    |
| 157        | AP1M1            | mmu-miR-574-5p                                                                      | 10.72           | 55             | mmu-miR-574-5p (AP1M1) |
| 189        | AP1M1            | mmu-miR-762                                                                         | 32.10           | 200            | mmu-miR-762 (AP1M1)    |
| 94         | AP1M2            | mmu-miR-24                                                                          | 62.00           | 62             | mmu-miR-24 (AP1M2)     |
| 171        | AP1M2            | mmu-miR-671-5p                                                                      | 12.09           | 51             | mmu-miR-671-5p (AP1M2) |
| 1          | AP1S1            | mmu-let-7a                                                                          | 18.75           | 70             | mmu-let-7a (AP1S1)     |
| 3          | AP1S1            | mmu-let-7b                                                                          | 17.25           | 62             | mmu-let-7b (AP1S1)     |
| 4          | AP1S1            | mmu-let-7c                                                                          | 18.42           | 66             | mmu-let-7c (AP1S1)     |
| 6          | AP1S1            | mmu-let-7d                                                                          | 5.63            | 18             | mmu-let-7d (AP1S1)     |
| 7          | AP1S1            | mmu-let-7e                                                                          | 16.74           | 58             | mmu-let-7e (AP1S1)     |
| 10         | AP1S1            | mmu-let-7i                                                                          | 19.58           | 73             | mmu-let-7i (AP1S1)     |
| 59         | AP1S1            | mmu-miR-1935                                                                        | 33.57           | 77             | mmu-miR-1935 (AP1S1)   |
| 12         | AP1S2            | mmu-miR-103                                                                         | 702.00          | 702            | mmu-miR-103 (AP1S2)    |
| 59         | PACS1            | mmu-miR-1935                                                                        | 39.22           | 91             | mmu-miR-1935 (PACS1)   |
| 98         | PACS1            | mmu-miR-2861                                                                        | 7.98            | 33             | mmu-miR-2861 (PACS1)   |
| 182        | PACS1            | mmu-miR-709                                                                         | 12.87           | 52             | mmu-miR-709 (PACS1)    |

| Pathway ID | Adjusted P-value | Pathway Name                     |            |           |                        |
|------------|------------------|----------------------------------|------------|-----------|------------------------|
| 66         | 0.001998         | KEGG_AMINOACYL_TRNA_BIOSYNTHESIS |            |           |                        |
| ASSAY ID   | Entrez Gene ID   | miRNA Name                       | miRNAscore | miRNArank | miRNA - Gene           |
| 195        | AARS             | mmu-miR-92a                      | 671.00     | 671       | mmu-miR-92a (AARS)     |
| 94         | AARS2            | mmu-miR-24                       | 438.00     | 438       | mmu-miR-24 (AARS2)     |
| 30         | DARS             | mmu-miR-138*                     | 204.50     | 204.5     | mmu-miR-138* (DARS)    |
| 73         | DARS             | mmu-miR-19b                      | 215.00     | 215       | mmu-miR-19b (DARS)     |
| 125        | DARS             | mmu-miR-3473a                    | 102.00     | 102       | mmu-miR-3473a (DARS)   |
| 94         | DARS2            | mmu-miR-24                       | 489.00     | 489       | mmu-miR-24 (DARS2)     |
| 162        | HARS             | mmu-miR-669b                     | 14.39      | 83        | mmu-miR-669b (HARS)    |
| 12         | IARS             | mmu-miR-103                      | 352.00     | 352       | mmu-miR-103 (IARS)     |
| 40         | IARS             | mmu-miR-15b                      | 72.73      | 378       | mmu-miR-15b (IARS)     |
| 103        | IARS             | mmu-miR-297a                     | 4.63       | 20        | mmu-miR-297a (IARS)    |
| 96         | MTFMT            | mmu-miR-26a                      | 40.97      | 208       | mmu-miR-26a (MTFMT)    |
| 73         | NARS             | mmu-miR-19b                      | 227.00     | 227       | mmu-miR-19b (NARS)     |
| 4          | PARS2            | mmu-let-7c                       | 34.53      | 183       | mmu-let-7c (PARS2)     |
| 7          | PARS2            | mmu-let-7e                       | 44.95      | 235       | mmu-let-7e (PARS2)     |
| 10         | PARS2            | mmu-let-7i                       | 23.74      | 106       | mmu-let-7i (PARS2)     |
| 1          | QARS             | mmu-let-7a                       | 19.68      | 76        | mmu-let-7a (QARS)      |
| 3          | QARS             | mmu-let-7b                       | 19.26      | 75        | mmu-let-7b (QARS)      |
| 4          | QARS             | mmu-let-7c                       | 18.24      | 65        | mmu-let-7c (QARS)      |
| 6          | QARS             | mmu-let-7d                       | 9.01       | 45        | mmu-let-7d (QARS)      |
| 7          | QARS             | mmu-let-7e                       | 19.59      | 75        | mmu-let-7e (QARS)      |
| 10         | QARS             | mmu-let-7i                       | 36.10      | 195       | mmu-let-7i (QARS)      |
| 41         | RARS             | mmu-miR-16*                      | 91.50      | 91.5      | mmu-miR-16* (RARS)     |
| 141        | RARS             | mmu-miR-466h                     | 2.91       | 1         | mmu-miR-466h (RARS)    |
| 94         | SARS2            | mmu-miR-24                       | 612.50     | 612.5     | mmu-miR-24 (SARS2)     |
| 12         | TARS             | mmu-miR-103                      | 689.00     | 689       | mmu-miR-103 (TARS)     |
| 30         | TARS             | mmu-miR-138*                     | 118.00     | 118       | mmu-miR-138* (TARS)    |
| 195        | VARS2            | mmu-miR-92a                      | 23.50      | 23.5      | mmu-miR-92a (VARS2)    |
| 24         | WARS             | mmu-miR-125b-5p                  | 52.08      | 272       | mmu-miR-125b-5p (WARS) |
| 48         | YARS             | mmu-miR-1894-3p                  | 4.90       | 20        | mmu-miR-1894-3p (YARS) |

| Pathway ID | Adjusted P-value | Pathway Name          |                 |                |                        |
|------------|------------------|-----------------------|-----------------|----------------|------------------------|
| 283        | 0.001998         | BIOCARTA_IL10_PATHWAY |                 |                |                        |
| ASSAY ID   | Entrez Gene ID   | miRNA Name            | miRNApath Score | miRNApath Rank | miRNA - Gene           |
| 94         | HMOX1            | mmu-miR-24            | 364.00          | 364            | mmu-miR-24 (HMOX1)     |
| 3          | IL10             | mmu-let-7b            | 36.28           | 194            | mmu-let-7b (IL10)      |
| 4          | IL10             | mmu-let-7c            | 46.41           | 249            | mmu-let-7c (IL10)      |
| 19         | IL10             | mmu-miR-1195          | 0.87            | 4              | mmu-miR-1195 (IL10)    |
| 44         | IL1A             | mmu-miR-181a          | 7.29            | 12             | mmu-miR-181a (IL1A)    |
| 45         | IL1A             | mmu-miR-181b          | 9.38            | 17             | mmu-miR-181b (IL1A)    |
| 1          | IL6              | mmu-let-7a            | 19.58           | 74             | mmu-let-7a (IL6)       |
| 3          | IL6              | mmu-let-7b            | 28.65           | 141            | mmu-let-7b (IL6)       |
| 4          | IL6              | mmu-let-7c            | 22.49           | 96             | mmu-let-7c (IL6)       |
| 7          | IL6              | mmu-let-7e            | 19.62           | 78             | mmu-let-7e (IL6)       |
| 10         | IL6              | mmu-let-7i            | 20.96           | 84             | mmu-let-7i (IL6)       |
| 44         | IL6              | mmu-miR-181a          | 11.79           | 30             | mmu-miR-181a (IL6)     |
| 45         | IL6              | mmu-miR-181b          | 11.04           | 22             | mmu-miR-181b (IL6)     |
| 13         | JAK1             | mmu-miR-106a          | 14.51           | 57             | mmu-miR-106a (JAK1)    |
| 43         | JAK1             | mmu-miR-17            | 42.24           | 185            | mmu-miR-17 (JAK1)      |
| 75         | JAK1             | mmu-miR-20a           | 34.05           | 133            | mmu-miR-20a (JAK1)     |
| 125        | JAK1             | mmu-miR-3473a         | 645.00          | 645            | mmu-miR-3473a (JAK1)   |
| 43         | STAT3            | mmu-miR-17            | 49.66           | 233            | mmu-miR-17 (STAT3)     |
| 75         | STAT3            | mmu-miR-20a           | 53.60           | 265            | mmu-miR-20a (STAT3)    |
| 174        | STAT3            | mmu-miR-690           | 8.28            | 45             | mmu-miR-690 (STAT3)    |
| 197        | STAT3            | mmu-miR-93            | 45.91           | 212            | mmu-miR-93 (STAT3)     |
| 125        | STAT5A           | mmu-miR-3473a         | 132.00          | 132            | mmu-miR-3473a (STAT5A) |
| 59         | STAT5B           | mmu-miR-1935          | 35.26           | 79             | mmu-miR-1935 (STAT5B)  |
| 73         | STAT5B           | mmu-miR-19b           | 646.00          | 646            | mmu-miR-19b (STAT5B)   |
| 189        | TNF              | mmu-miR-762           | 39.09           | 236            | mmu-miR-762 (TNF)      |
| 195        | TNF              | mmu-miR-92a           | 422.00          | 422            | mmu-miR-92a (TNF)      |

| Pathway ID | Adjusted P-value | Pathway Name                          |                 |                |                           |
|------------|------------------|---------------------------------------|-----------------|----------------|---------------------------|
| 730        | 0.001998         | REACTOME_GLYCOSPHINGOLIPID_METABOLISM |                 |                |                           |
| ASSAY ID   | Entrez Gene ID   | miRNA Name                            | miRNApath Score | miRNApath Rank | miRNA - Gene              |
| 94         | ARSI             | mmu-miR-24                            | 342.00          | 342            | mmu-miR-24 (ARSI)         |
| 44         | ARSJ             | mmu-miR-181a                          | 41.17           | 182            | mmu-miR-181a (ARSJ)       |
| 45         | ARSJ             | mmu-miR-181b                          | 20.62           | 73             | mmu-miR-181b (ARSJ)       |
| 195        | ASAH1            | mmu-miR-92a                           | 130.50          | 130.5          | mmu-miR-92a (ASAH1)       |
| 49         | GAL3ST1          | mmu-miR-1894-5p                       | 11.09           | 54             | mmu-miR-1894-5p (GAL3ST1) |
| 171        | GAL3ST1          | mmu-miR-671-5p                        | 3.64            | 7              | mmu-miR-671-5p (GAL3ST1)  |
| 94         | GBA2             | mmu-miR-24                            | 3.00            | 3              | mmu-miR-24 (GBA2)         |
| 195        | GLA              | mmu-miR-92a                           | 300.00          | 300            | mmu-miR-92a (GLA)         |
| 94         | GLB1             | mmu-miR-24                            | 15.00           | 15             | mmu-miR-24 (GLB1)         |
| 94         | HEXA             | mmu-miR-24                            | 230.00          | 230            | mmu-miR-24 (HEXA)         |
| 94         | NEU1             | mmu-miR-24                            | 650.00          | 650            | mmu-miR-24 (NEU1)         |
| 171        | NEU2             | mmu-miR-671-5p                        | 18.34           | 90             | mmu-miR-671-5p (NEU2)     |
| 189        | NEU2             | mmu-miR-762                           | 37.66           | 229            | mmu-miR-762 (NEU2)        |
| 44         | PSAP             | mmu-miR-181a                          | 80.26           | 358            | mmu-miR-181a (PSAP)       |
| 40         | SMPD1            | mmu-miR-15b                           | 42.08           | 202            | mmu-miR-15b (SMPD1)       |
| 42         | SMPD1            | mmu-miR-16                            | 49.86           | 260            | mmu-miR-16 (SMPD1)        |
| 59         | SMPD3            | mmu-miR-1935                          | 9.37            | 10             | mmu-miR-1935 (SMPD3)      |
| 125        | SMPD3            | mmu-miR-3473a                         | 289.00          | 289            | mmu-miR-3473a (SMPD3)     |
| 43         | SUMF1            | mmu-miR-17                            | 66.07           | 327            | mmu-miR-17 (SUMF1)        |
| 59         | SUMF1            | mmu-miR-1935                          | 76.55           | 174            | mmu-miR-1935 (SUMF1)      |
| 75         | SUMF1            | mmu-miR-20a                           | 87.00           | 408            | mmu-miR-20a (SUMF1)       |
| 197        | SUMF1            | mmu-miR-93                            | 57.78           | 271            | mmu-miR-93 (SUMF1)        |
| 125        | SUMF2            | mmu-miR-3473a                         | 234.00          | 234            | mmu-miR-3473a (SUMF2)     |
| 1          | UGCG             | mmu-let-7a                            | 67.11           | 304            | mmu-let-7a (UGCG)         |
| 3          | UGCG             | mmu-let-7b                            | 74.62           | 318            | mmu-let-7b (UGCG)         |
| 4          | UGCG             | mmu-let-7c                            | 61.37           | 305            | mmu-let-7c (UGCG)         |
| 7          | UGCG             | mmu-let-7e                            | 56.19           | 276            | mmu-let-7e (UGCG)         |
| 10         | UGCG             | mmu-let-7i                            | 62.89           | 302            | mmu-let-7i (UGCG)         |
| 58         | UGCG             | mmu-miR-1931                          | 6.73            | 29             | mmu-miR-1931 (UGCG)       |

| Pathway ID | Adjusted P-value | Pathway Name          |                 |                |                       |
|------------|------------------|-----------------------|-----------------|----------------|-----------------------|
| 277        | 0.002997         | BIOCARTA_IL17_PATHWAY |                 |                |                       |
| ASSAY ID   | Entrez Gene ID   | miRNA Name            | miRNApath Score | miRNApath Rank | miRNA - Gene          |
| 94         | CD34             | mmu-miR-24            | 590.00          | 590            | mmu-miR-24 (CD34)     |
| 171        | CD34             | mmu-miR-671-5p        | 14.19           | 68             | mmu-miR-671-5p (CD34) |
| 189        | CD3E             | mmu-miR-762           | 33.21           | 209            | mmu-miR-762 (CD3E)    |
| 44         | CD4              | mmu-miR-181a          | 78.24           | 346            | mmu-miR-181a (CD4)    |
| 45         | CD4              | mmu-miR-181b          | 61.50           | 290            | mmu-miR-181b (CD4)    |
| 125        | CSF3             | mmu-miR-3473a         | 326.00          | 326            | mmu-miR-3473a (CSF3)  |
| 1          | IL6              | mmu-let-7a            | 19.58           | 74             | mmu-let-7a (IL6)      |
| 3          | IL6              | mmu-let-7b            | 28.65           | 141            | mmu-let-7b (IL6)      |
| 4          | IL6              | mmu-let-7c            | 22.49           | 96             | mmu-let-7c (IL6)      |
| 7          | IL6              | mmu-let-7e            | 19.62           | 78             | mmu-let-7e (IL6)      |
| 10         | IL6              | mmu-let-7i            | 20.96           | 84             | mmu-let-7i (IL6)      |
| 44         | IL6              | mmu-miR-181a          | 11.79           | 30             | mmu-miR-181a (IL6)    |
| 45         | IL6              | mmu-miR-181b          | 11.04           | 22             | mmu-miR-181b (IL6)    |

| Pathway ID | Adjusted P-value | Pathway Name                       |                 |                |                       |
|------------|------------------|------------------------------------|-----------------|----------------|-----------------------|
| 952        | 0.002997         | REACTOME_METABOLISM_OF_NUCLEOTIDES |                 |                |                       |
| ASSAY ID   | Entrez Gene ID   | miRNA Name                         | miRNApath Score | miRNApath Rank | miRNA - Gene          |
| 12         | ADAL             | mmu-miR-103                        | 480.00          | 480            | mmu-miR-103 (ADAL)    |
| 195        | ADK              | mmu-miR-92a                        | 159.50          | 159.5          | mmu-miR-92a (ADK)     |
| 94         | ADSSL1           | mmu-miR-24                         | 275.00          | 275            | mmu-miR-24 (ADSSL1)   |
| 3          | AGXT2            | mmu-let-7b                         | 15.39           | 50             | mmu-let-7b (AGXT2)    |
| 43         | AMPD3            | mmu-miR-17                         | 82.57           | 379            | mmu-miR-17 (AMPD3)    |
| 75         | AMPD3            | mmu-miR-20a                        | 85.59           | 405            | mmu-miR-20a (AMPD3)   |
| 197        | AMPD3            | mmu-miR-93                         | 82.37           | 373            | mmu-miR-93 (AMPD3)    |
| 41         | CAD              | mmu-miR-16*                        | 114.00          | 114            | mmu-miR-16* (CAD)     |
| 98         | CAD              | mmu-miR-2861                       | 8.17            | 36             | mmu-miR-2861 (CAD)    |
| 12         | CDA              | mmu-miR-103                        | 697.00          | 697            | mmu-miR-103 (CDA)     |
| 58         | CTPS             | mmu-miR-1931                       | 8.05            | 39             | mmu-miR-1931 (CTPS)   |
| 140        | CTPS             | mmu-miR-466g                       | 22.81           | 101            | mmu-miR-466g (CTPS)   |
| 73         | DGUOK            | mmu-miR-19b                        | 361.50          | 361.5          | mmu-miR-19b (DGUOK)   |
| 94         | DHODH            | mmu-miR-24                         | 494.00          | 494            | mmu-miR-24 (DHODH)    |
| 195        | DTYMK            | mmu-miR-92a                        | 559.50          | 559.5          | mmu-miR-92a (DTYMK)   |
| 41         | GART             | mmu-miR-16*                        | 158.50          | 158.5          | mmu-miR-16* (GART)    |
| 94         | GMPR             | mmu-miR-24                         | 207.00          | 207            | mmu-miR-24 (GMPR)     |
| 193        | GPX1             | mmu-miR-877                        | 7.08            | 34             | mmu-miR-877 (GPX1)    |
| 59         | IMPDH1           | mmu-miR-1935                       | 43.71           | 106            | mmu-miR-1935 (IMPDH1) |

|     |        |                 |        |       |                          |
|-----|--------|-----------------|--------|-------|--------------------------|
| 73  | IMPDH1 | mmu-miR-19b     | 17.00  | 17    | mmu-miR-19b (IMPDH1)     |
| 141 | IMPDH1 | mmu-miR-466h    | 11.21  | 51    | mmu-miR-466h (IMPDH1)    |
| 143 | IMPDH1 | mmu-miR-466j    | 8.19   | 31    | mmu-miR-466j (IMPDH1)    |
| 182 | IMPDH1 | mmu-miR-709     | 14.13  | 63    | mmu-miR-709 (IMPDH1)     |
| 198 | IMPDH1 | mmu-miR-99a     | 0.76   | 2     | mmu-miR-99a (IMPDH1)     |
| 200 | IMPDH1 | mmu-miR-99b     | 0.87   | 2     | mmu-miR-99b (IMPDH1)     |
| 1   | NME4   | mmu-let-7a      | 12.52  | 35    | mmu-let-7a (NME4)        |
| 3   | NME4   | mmu-let-7b      | 13.14  | 32    | mmu-let-7b (NME4)        |
| 4   | NME4   | mmu-let-7c      | 13.01  | 37    | mmu-let-7c (NME4)        |
| 6   | NME4   | mmu-let-7d      | 3.68   | 6     | mmu-let-7d (NME4)        |
| 7   | NME4   | mmu-let-7e      | 13.23  | 39    | mmu-let-7e (NME4)        |
| 10  | NME4   | mmu-let-7i      | 13.02  | 35    | mmu-let-7i (NME4)        |
| 41  | NME4   | mmu-miR-16*     | 293.00 | 293   | mmu-miR-16* (NME4)       |
| 189 | NME4   | mmu-miR-762     | 4.45   | 4     | mmu-miR-762 (NME4)       |
| 94  | NT5C1A | mmu-miR-24      | 123.50 | 123.5 | mmu-miR-24 (NT5C1A)      |
| 122 | NT5C3  | mmu-miR-3470a   | 3.15   | 12    | mmu-miR-3470a (NT5C3)    |
| 195 | NT5M   | mmu-miR-92a     | 459.00 | 459   | mmu-miR-92a (NT5M)       |
| 171 | PAICS  | mmu-miR-671-5p  | 27.81  | 116   | mmu-miR-671-5p (PAICS)   |
| 24  | PPAT   | mmu-miR-125b-5p | 46.30  | 252   | mmu-miR-125b-5p (PPAT)   |
| 1   | RRM2   | mmu-let-7a      | 70.21  | 308   | mmu-let-7a (RRM2)        |
| 3   | RRM2   | mmu-let-7b      | 70.15  | 313   | mmu-let-7b (RRM2)        |
| 4   | RRM2   | mmu-let-7c      | 71.61  | 323   | mmu-let-7c (RRM2)        |
| 7   | RRM2   | mmu-let-7e      | 62.88  | 289   | mmu-let-7e (RRM2)        |
| 10  | RRM2   | mmu-let-7i      | 41.52  | 217   | mmu-let-7i (RRM2)        |
| 13  | RRM2   | mmu-miR-106a    | 25.89  | 108   | mmu-miR-106a (RRM2)      |
| 75  | RRM2   | mmu-miR-20a     | 118.61 | 456   | mmu-miR-20a (RRM2)       |
| 197 | RRM2   | mmu-miR-93      | 79.13  | 362   | mmu-miR-93 (RRM2)        |
| 125 | TK1    | mmu-miR-3473a   | 592.00 | 592   | mmu-miR-3473a (TK1)      |
| 171 | TK2    | mmu-miR-671-5p  | 15.68  | 74    | mmu-miR-671-5p (TK2)     |
| 24  | TXNRD1 | mmu-miR-125b-5p | 85.04  | 311   | mmu-miR-125b-5p (TXNRD1) |
| 12  | UCK2   | mmu-miR-103     | 211.00 | 211   | mmu-miR-103 (UCK2)       |
| 195 | UPB1   | mmu-miR-92a     | 646.00 | 646   | mmu-miR-92a (UPB1)       |
| 30  | UPP1   | mmu-miR-138*    | 74.00  | 74    | mmu-miR-138* (UPP1)      |
| 195 | UPP2   | mmu-miR-92a     | 410.00 | 410   | mmu-miR-92a (UPP2)       |
| 73  | XDH    | mmu-miR-19b     | 19.00  | 19    | mmu-miR-19b (XDH)        |



| Pathway ID | Adjusted P-value | Pathway Name                       |                 |                |                      |
|------------|------------------|------------------------------------|-----------------|----------------|----------------------|
| 125        | 0.003996         | KEGG_CYTOSOLIC_DNA_SENSING_PATHWAY |                 |                |                      |
| ASSAY ID   | Entrez Gene ID   | miRNA Name                         | miRNApath Score | miRNApath Rank | miRNA - Gene         |
| 12         | CASP1            | mmu-miR-103                        | 429.50          | 429.5          | mmu-miR-103 (CASP1)  |
| 213        | CASP1            | mmu-miR-103                        | 429.50          | 429.5          | mmu-miR-103 (CASP1)  |
| 195        | IFNA14           | mmu-miR-92a                        | 332.00          | 332            | mmu-miR-92a (IFNA14) |
| 473        | IFNA14           | mmu-miR-92a                        | 332.00          | 332            | mmu-miR-92a (IFNA14) |
| 1          | IKBKE            | mmu-let-7a                         | 43.83           | 229            | mmu-let-7a (IKBKE)   |
| 201        | IKBKE            | mmu-let-7a                         | 43.83           | 229            | mmu-let-7a (IKBKE)   |
| 3          | IKBKE            | mmu-let-7b                         | 38.28           | 205            | mmu-let-7b (IKBKE)   |
| 203        | IKBKE            | mmu-let-7b                         | 38.28           | 205            | mmu-let-7b (IKBKE)   |
| 4          | IKBKE            | mmu-let-7c                         | 30.69           | 148            | mmu-let-7c (IKBKE)   |
| 204        | IKBKE            | mmu-let-7c                         | 30.69           | 148            | mmu-let-7c (IKBKE)   |
| 6          | IKBKE            | mmu-let-7d                         | 13.94           | 70             | mmu-let-7d (IKBKE)   |
| 206        | IKBKE            | mmu-let-7d                         | 13.94           | 70             | mmu-let-7d (IKBKE)   |
| 7          | IKBKE            | mmu-let-7e                         | 27.89           | 145            | mmu-let-7e (IKBKE)   |
| 207        | IKBKE            | mmu-let-7e                         | 27.89           | 145            | mmu-let-7e (IKBKE)   |
| 10         | IKBKE            | mmu-let-7i                         | 43.43           | 224            | mmu-let-7i (IKBKE)   |
| 210        | IKBKE            | mmu-let-7i                         | 43.43           | 224            | mmu-let-7i (IKBKE)   |
| 12         | IKBKE            | mmu-miR-103                        | 419.00          | 419            | mmu-miR-103 (IKBKE)  |
| 213        | IKBKE            | mmu-miR-103                        | 419.00          | 419            | mmu-miR-103 (IKBKE)  |
| 1          | IL6              | mmu-let-7a                         | 19.58           | 74             | mmu-let-7a (IL6)     |
| 201        | IL6              | mmu-let-7a                         | 19.58           | 74             | mmu-let-7a (IL6)     |
| 3          | IL6              | mmu-let-7b                         | 28.65           | 141            | mmu-let-7b (IL6)     |
| 203        | IL6              | mmu-let-7b                         | 28.65           | 141            | mmu-let-7b (IL6)     |
| 4          | IL6              | mmu-let-7c                         | 22.49           | 96             | mmu-let-7c (IL6)     |
| 204        | IL6              | mmu-let-7c                         | 22.49           | 96             | mmu-let-7c (IL6)     |
| 7          | IL6              | mmu-let-7e                         | 19.62           | 78             | mmu-let-7e (IL6)     |
| 207        | IL6              | mmu-let-7e                         | 19.62           | 78             | mmu-let-7e (IL6)     |
| 10         | IL6              | mmu-let-7i                         | 20.96           | 84             | mmu-let-7i (IL6)     |
| 210        | IL6              | mmu-let-7i                         | 20.96           | 84             | mmu-let-7i (IL6)     |
| 44         | IL6              | mmu-miR-181a                       | 11.79           | 30             | mmu-miR-181a (IL6)   |
| 264        | IL6              | mmu-miR-181a                       | 11.79           | 30             | mmu-miR-181a (IL6)   |
| 45         | IL6              | mmu-miR-181b                       | 11.04           | 22             | mmu-miR-181b (IL6)   |
| 265        | IL6              | mmu-miR-181b                       | 11.04           | 22             | mmu-miR-181b (IL6)   |
| 195        | NFKB1            | mmu-miR-92a                        | 293.00          | 293            | mmu-miR-92a (NFKB1)  |
| 473        | NFKB1            | mmu-miR-92a                        | 293.00          | 293            | mmu-miR-92a (NFKB1)  |
| 73         | NFKBIA           | mmu-miR-19b                        | 80.00           | 80             | mmu-miR-19b (NFKBIA) |
| 317        | NFKBIA           | mmu-miR-19b                        | 80.00           | 80             | mmu-miR-19b (NFKBIA) |
| 73         | POLR1C           | mmu-miR-19b                        | 153.00          | 153            | mmu-miR-19b (POLR1C) |
| 317        | POLR1C           | mmu-miR-19b                        | 153.00          | 153            | mmu-miR-19b (POLR1C) |

|     |         |               |        |     |                         |
|-----|---------|---------------|--------|-----|-------------------------|
| 41  | POLR3C  | mmu-miR-16*   | 232.00 | 232 | mmu-miR-16* (POLR3C)    |
| 258 | POLR3C  | mmu-miR-16*   | 232.00 | 232 | mmu-miR-16* (POLR3C)    |
| 12  | POLR3D  | mmu-miR-103   | 595.00 | 595 | mmu-miR-103 (POLR3D)    |
| 213 | POLR3D  | mmu-miR-103   | 595.00 | 595 | mmu-miR-103 (POLR3D)    |
| 41  | POLR3D  | mmu-miR-16*   | 119.00 | 119 | mmu-miR-16* (POLR3D)    |
| 258 | POLR3D  | mmu-miR-16*   | 119.00 | 119 | mmu-miR-16* (POLR3D)    |
| 40  | POLR3F  | mmu-miR-15b   | 50.66  | 253 | mmu-miR-15b (POLR3F)    |
| 257 | POLR3F  | mmu-miR-15b   | 50.66  | 253 | mmu-miR-15b (POLR3F)    |
| 42  | POLR3F  | mmu-miR-16    | 47.55  | 240 | mmu-miR-16 (POLR3F)     |
| 259 | POLR3F  | mmu-miR-16    | 47.55  | 240 | mmu-miR-16 (POLR3F)     |
| 75  | POLR3G  | mmu-miR-20a   | 43.81  | 195 | mmu-miR-20a (POLR3G)    |
| 321 | POLR3G  | mmu-miR-20a   | 43.81  | 195 | mmu-miR-20a (POLR3G)    |
| 197 | POLR3G  | mmu-miR-93    | 41.21  | 183 | mmu-miR-93 (POLR3G)     |
| 476 | POLR3G  | mmu-miR-93    | 41.21  | 183 | mmu-miR-93 (POLR3G)     |
| 94  | PYCARD  | mmu-miR-24    | 396.00 | 396 | mmu-miR-24 (PYCARD)     |
| 348 | PYCARD  | mmu-miR-24    | 396.00 | 396 | mmu-miR-24 (PYCARD)     |
| 73  | TBK1    | mmu-miR-19b   | 625.00 | 625 | mmu-miR-19b (TBK1)      |
| 317 | TBK1    | mmu-miR-19b   | 625.00 | 625 | mmu-miR-19b (TBK1)      |
| 125 | TMEM173 | mmu-miR-3473a | 546.00 | 546 | mmu-miR-3473a (TMEM173) |
| 41  | ZBP1    | mmu-miR-16*   | 264.00 | 264 | mmu-miR-16* (ZBP1)      |
| 258 | ZBP1    | mmu-miR-16*   | 264.00 | 264 | mmu-miR-16* (ZBP1)      |

| Pathway ID | Adjusted P-value | Pathway Name     |                 |                |                       |
|------------|------------------|------------------|-----------------|----------------|-----------------------|
| 615        | 0.004995         | PID_ARF_3PATHWAY |                 |                |                       |
| ASSAY ID   | Entrez Gene ID   | miRNA Name       | miRNApath Score | miRNApath Rank | miRNA - Gene          |
| 12         | AP2A1            | mmu-miR-103      | 639.00          | 639            | mmu-miR-103 (AP2A1)   |
| 73         | AP2M1            | mmu-miR-19b      | 547.00          | 547            | mmu-miR-19b (AP2M1)   |
| 180        | AP2M1            | mmu-miR-705      | 22.58           | 134            | mmu-miR-705 (AP2M1)   |
| 162        | ARFIP2           | mmu-miR-669b     | 25.21           | 132            | mmu-miR-669b (ARFIP2) |
| 73         | ASAP1            | mmu-miR-19b      | 275.00          | 275            | mmu-miR-19b (ASAP1)   |
| 44         | CD4              | mmu-miR-181a     | 78.24           | 346            | mmu-miR-181a (CD4)    |
| 45         | CD4              | mmu-miR-181b     | 61.50           | 290            | mmu-miR-181b (CD4)    |
| 172        | CLTA             | mmu-miR-674      | 6.45            | 25             | mmu-miR-674 (CLTA)    |
| 189        | CLTB             | mmu-miR-762      | 18.05           | 92             | mmu-miR-762 (CLTB)    |
| 13         | GBF1             | mmu-miR-106a     | 30.49           | 110            | mmu-miR-106a (GBF1)   |
| 43         | GBF1             | mmu-miR-17       | 48.00           | 222            | mmu-miR-17 (GBF1)     |
| 75         | GBF1             | mmu-miR-20a      | 106.95          | 445            | mmu-miR-20a (GBF1)    |
| 182        | GBF1             | mmu-miR-709      | 26.91           | 165            | mmu-miR-709 (GBF1)    |
| 197        | GBF1             | mmu-miR-93       | 32.57           | 130            | mmu-miR-93 (GBF1)     |
| 1          | GGA3             | mmu-let-7a       | 23.26           | 110            | mmu-let-7a (GGA3)     |
| 3          | GGA3             | mmu-let-7b       | 19.01           | 72             | mmu-let-7b (GGA3)     |
| 4          | GGA3             | mmu-let-7c       | 19.89           | 77             | mmu-let-7c (GGA3)     |
| 6          | GGA3             | mmu-let-7d       | 8.93            | 44             | mmu-let-7d (GGA3)     |
| 7          | GGA3             | mmu-let-7e       | 38.46           | 206            | mmu-let-7e (GGA3)     |
| 10         | GGA3             | mmu-let-7i       | 27.25           | 134            | mmu-let-7i (GGA3)     |
| 30         | GGA3             | mmu-miR-138*     | 62.00           | 62             | mmu-miR-138* (GGA3)   |
| 40         | GGA3             | mmu-miR-15b      | 51.94           | 262            | mmu-miR-15b (GGA3)    |
| 42         | GGA3             | mmu-miR-16       | 82.24           | 405            | mmu-miR-16 (GGA3)     |
| 189        | KDELR1           | mmu-miR-762      | 46.95           | 248            | mmu-miR-762 (KDELR1)  |
| 30         | PLD2             | mmu-miR-138*     | 2.00            | 2              | mmu-miR-138* (PLD2)   |
| 189        | PLD2             | mmu-miR-762      | 43.92           | 247            | mmu-miR-762 (PLD2)    |

| Pathway ID | Adjusted P-value | Pathway Name                                                          |                 |                |                        |
|------------|------------------|-----------------------------------------------------------------------|-----------------|----------------|------------------------|
| 1251       | 0.004995         | REACTOME_THE_ROLE_OF_NEF_IN_HIV1_REPLICATION_AND_DISEASE_PATHOGENESIS |                 |                |                        |
| ASSAY ID   | Entrez Gene ID   | miRNA Name                                                            | miRNApath Score | miRNApath Rank | miRNA - Gene           |
| 18         | AP1G1            | mmu-miR-1187                                                          | 5.82            | 17             | mmu-miR-1187 (AP1G1)   |
| 56         | AP1G1            | mmu-miR-191                                                           | 2.81            | 20             | mmu-miR-191 (AP1G1)    |
| 180        | AP1G1            | mmu-miR-705                                                           | 4.49            | 4              | mmu-miR-705 (AP1G1)    |
| 12         | AP1M1            | mmu-miR-103                                                           | 564.00          | 564            | mmu-miR-103 (AP1M1)    |
| 157        | AP1M1            | mmu-miR-574-5p                                                        | 10.72           | 55             | mmu-miR-574-5p (AP1M1) |
| 189        | AP1M1            | mmu-miR-762                                                           | 32.10           | 200            | mmu-miR-762 (AP1M1)    |
| 94         | AP1M2            | mmu-miR-24                                                            | 62.00           | 62             | mmu-miR-24 (AP1M2)     |
| 171        | AP1M2            | mmu-miR-671-5p                                                        | 12.09           | 51             | mmu-miR-671-5p (AP1M2) |
| 1          | AP1S1            | mmu-let-7a                                                            | 18.75           | 70             | mmu-let-7a (AP1S1)     |
| 3          | AP1S1            | mmu-let-7b                                                            | 17.25           | 62             | mmu-let-7b (AP1S1)     |
| 4          | AP1S1            | mmu-let-7c                                                            | 18.42           | 66             | mmu-let-7c (AP1S1)     |
| 6          | AP1S1            | mmu-let-7d                                                            | 5.63            | 18             | mmu-let-7d (AP1S1)     |
| 7          | AP1S1            | mmu-let-7e                                                            | 16.74           | 58             | mmu-let-7e (AP1S1)     |
| 10         | AP1S1            | mmu-let-7i                                                            | 19.58           | 73             | mmu-let-7i (AP1S1)     |
| 59         | AP1S1            | mmu-miR-1935                                                          | 33.57           | 77             | mmu-miR-1935 (AP1S1)   |
| 12         | AP1S2            | mmu-miR-103                                                           | 702.00          | 702            | mmu-miR-103 (AP1S2)    |
| 12         | AP2A1            | mmu-miR-103                                                           | 639.00          | 639            | mmu-miR-103 (AP2A1)    |
| 73         | AP2M1            | mmu-miR-19b                                                           | 547.00          | 547            | mmu-miR-19b (AP2M1)    |
| 180        | AP2M1            | mmu-miR-705                                                           | 22.58           | 134            | mmu-miR-705 (AP2M1)    |
| 182        | AP2S1            | mmu-miR-709                                                           | 38.55           | 220            | mmu-miR-709 (AP2S1)    |
| 40         | CD28             | mmu-miR-15b                                                           | 96.14           | 472            | mmu-miR-15b (CD28)     |
| 42         | CD28             | mmu-miR-16                                                            | 105.30          | 477            | mmu-miR-16 (CD28)      |
| 44         | CD4              | mmu-miR-181a                                                          | 78.24           | 346            | mmu-miR-181a (CD4)     |
| 45         | CD4              | mmu-miR-181b                                                          | 61.50           | 290            | mmu-miR-181b (CD4)     |
| 24         | HCK              | mmu-miR-125b-5p                                                       | 25.07           | 125            | mmu-miR-125b-5p (HCK)  |
| 141        | LCK              | mmu-miR-466h                                                          | 14.47           | 71             | mmu-miR-466h (LCK)     |
| 59         | PACS1            | mmu-miR-1935                                                          | 39.22           | 91             | mmu-miR-1935 (PACS1)   |
| 98         | PACS1            | mmu-miR-2861                                                          | 7.98            | 33             | mmu-miR-2861 (PACS1)   |
| 182        | PACS1            | mmu-miR-709                                                           | 12.87           | 52             | mmu-miR-709 (PACS1)    |
| 93         | PAK2             | mmu-miR-23b                                                           | 3.09            | 13             | mmu-miR-23b (PAK2)     |
| 96         | PAK2             | mmu-miR-26a                                                           | 34.14           | 173            | mmu-miR-26a (PAK2)     |
| 125        | PAK2             | mmu-miR-3473a                                                         | 44.00           | 44             | mmu-miR-3473a (PAK2)   |

| Pathway ID | Adjusted P-value | Pathway Name                                                                                            |                 |                |                        |
|------------|------------------|---------------------------------------------------------------------------------------------------------|-----------------|----------------|------------------------|
| 697        | 0.005994         | REACTOME_NEF_MEDIATES_DOWN_MODULATION_OF_CELL_SURFACE_RECEPTORS_BY_RECRUITING_THEM_TO_CLATHRIN_ADAPTERS |                 |                |                        |
| ASSAY ID   | Entrez Gene ID   | miRNA Name                                                                                              | miRNApath Score | miRNApath Rank | miRNA - Gene           |
| 18         | AP1G1            | mmu-miR-1187                                                                                            | 5.82            | 17             | mmu-miR-1187 (AP1G1)   |
| 56         | AP1G1            | mmu-miR-191                                                                                             | 2.81            | 20             | mmu-miR-191 (AP1G1)    |
| 180        | AP1G1            | mmu-miR-705                                                                                             | 4.49            | 4              | mmu-miR-705 (AP1G1)    |
| 12         | AP1M1            | mmu-miR-103                                                                                             | 564.00          | 564            | mmu-miR-103 (AP1M1)    |
| 157        | AP1M1            | mmu-miR-574-5p                                                                                          | 10.72           | 55             | mmu-miR-574-5p (AP1M1) |
| 189        | AP1M1            | mmu-miR-762                                                                                             | 32.10           | 200            | mmu-miR-762 (AP1M1)    |
| 94         | AP1M2            | mmu-miR-24                                                                                              | 62.00           | 62             | mmu-miR-24 (AP1M2)     |
| 171        | AP1M2            | mmu-miR-671-5p                                                                                          | 12.09           | 51             | mmu-miR-671-5p (AP1M2) |
| 1          | AP1S1            | mmu-let-7a                                                                                              | 18.75           | 70             | mmu-let-7a (AP1S1)     |
| 3          | AP1S1            | mmu-let-7b                                                                                              | 17.25           | 62             | mmu-let-7b (AP1S1)     |
| 4          | AP1S1            | mmu-let-7c                                                                                              | 18.42           | 66             | mmu-let-7c (AP1S1)     |
| 6          | AP1S1            | mmu-let-7d                                                                                              | 5.63            | 18             | mmu-let-7d (AP1S1)     |
| 7          | AP1S1            | mmu-let-7e                                                                                              | 16.74           | 58             | mmu-let-7e (AP1S1)     |
| 10         | AP1S1            | mmu-let-7i                                                                                              | 19.58           | 73             | mmu-let-7i (AP1S1)     |
| 59         | AP1S1            | mmu-miR-1935                                                                                            | 33.57           | 77             | mmu-miR-1935 (AP1S1)   |
| 12         | AP1S2            | mmu-miR-103                                                                                             | 702.00          | 702            | mmu-miR-103 (AP1S2)    |
| 12         | AP2A1            | mmu-miR-103                                                                                             | 639.00          | 639            | mmu-miR-103 (AP2A1)    |
| 73         | AP2M1            | mmu-miR-19b                                                                                             | 547.00          | 547            | mmu-miR-19b (AP2M1)    |
| 180        | AP2M1            | mmu-miR-705                                                                                             | 22.58           | 134            | mmu-miR-705 (AP2M1)    |
| 182        | AP2S1            | mmu-miR-709                                                                                             | 38.55           | 220            | mmu-miR-709 (AP2S1)    |
| 40         | CD28             | mmu-miR-15b                                                                                             | 96.14           | 472            | mmu-miR-15b (CD28)     |
| 42         | CD28             | mmu-miR-16                                                                                              | 105.30          | 477            | mmu-miR-16 (CD28)      |
| 44         | CD4              | mmu-miR-181a                                                                                            | 78.24           | 346            | mmu-miR-181a (CD4)     |
| 45         | CD4              | mmu-miR-181b                                                                                            | 61.50           | 290            | mmu-miR-181b (CD4)     |
| 141        | LCK              | mmu-miR-466h                                                                                            | 14.47           | 71             | mmu-miR-466h (LCK)     |
| 59         | PACS1            | mmu-miR-1935                                                                                            | 39.22           | 91             | mmu-miR-1935 (PACS1)   |
| 98         | PACS1            | mmu-miR-2861                                                                                            | 7.98            | 33             | mmu-miR-2861 (PACS1)   |
| 182        | PACS1            | mmu-miR-709                                                                                             | 12.87           | 52             | mmu-miR-709 (PACS1)    |

| Pathway ID | Adjusted P-value | Pathway Name  |                 |                |                       |
|------------|------------------|---------------|-----------------|----------------|-----------------------|
| 177        | 0.007992         | KEGG_ASTHMA   |                 |                |                       |
| ASSAY ID   | Entrez Gene ID   | miRNA Name    | miRNApath Score | miRNApath Rank | miRNA - Gene          |
| 73         | CCL11            | mmu-miR-19b   | 137.00          | 137            | mmu-miR-19b (CCL11)   |
| 41         | CD40LG           | mmu-miR-16*   | 143.00          | 143            | mmu-miR-16* (CD40LG)  |
| 94         | CD40LG           | mmu-miR-24    | 244.00          | 244            | mmu-miR-24 (CD40LG)   |
| 3          | IL10             | mmu-let-7b    | 36.28           | 194            | mmu-let-7b (IL10)     |
| 4          | IL10             | mmu-let-7c    | 46.41           | 249            | mmu-let-7c (IL10)     |
| 19         | IL10             | mmu-miR-1195  | 0.87            | 4              | mmu-miR-1195 (IL10)   |
| 1          | IL13             | mmu-let-7a    | 9.82            | 21             | mmu-let-7a (IL13)     |
| 3          | IL13             | mmu-let-7b    | 9.16            | 20             | mmu-let-7b (IL13)     |
| 4          | IL13             | mmu-let-7c    | 12.38           | 33             | mmu-let-7c (IL13)     |
| 6          | IL13             | mmu-let-7d    | 7.88            | 39             | mmu-let-7d (IL13)     |
| 7          | IL13             | mmu-let-7e    | 12.99           | 38             | mmu-let-7e (IL13)     |
| 10         | IL13             | mmu-let-7i    | 17.99           | 64             | mmu-let-7i (IL13)     |
| 94         | IL4              | mmu-miR-24    | 193.50          | 193.5          | mmu-miR-24 (IL4)      |
| 125        | MS4A2            | mmu-miR-3473a | 249.00          | 249            | mmu-miR-3473a (MS4A2) |
| 182        | PRG2             | mmu-miR-709   | 35.56           | 207            | mmu-miR-709 (PRG2)    |
| 189        | TNF              | mmu-miR-762   | 39.09           | 236            | mmu-miR-762 (TNF)     |
| 195        | TNF              | mmu-miR-92a   | 422.00          | 422            | mmu-miR-92a (TNF)     |

| Pathway ID | Adjusted P-value | Pathway Name         |                 |                |                           |
|------------|------------------|----------------------|-----------------|----------------|---------------------------|
| 282        | 0.007992         | BIOCARTA_IL6_PATHWAY |                 |                |                           |
| ASSAY ID   | Entrez Gene ID   | miRNA Name           | miRNApath Score | miRNApath Rank | miRNA - Gene              |
| 56         | CEBPB            | mmu-miR-191          | 2.03            | 6              | mmu-miR-191 (CEBPB)       |
| 24         | CSNK2A1          | mmu-miR-125b-5p      | 59.73           | 287            | mmu-miR-125b-5p (CSNK2A1) |
| 137        | CSNK2A1          | mmu-miR-466f-3p      | 13.01           | 48             | mmu-miR-466f-3p (CSNK2A1) |
| 148        | CSNK2A1          | mmu-miR-467f         | 23.76           | 104            | mmu-miR-467f (CSNK2A1)    |
| 46         | ELK1             | mmu-miR-1892         | 1.75            | 2              | mmu-miR-1892 (ELK1)       |
| 49         | ELK1             | mmu-miR-1894-5p      | 6.54            | 18             | mmu-miR-1894-5p (ELK1)    |
| 44         | FOS              | mmu-miR-181a         | 28.65           | 113            | mmu-miR-181a (FOS)        |
| 125        | GRB2             | mmu-miR-3473a        | 91.00           | 91             | mmu-miR-3473a (GRB2)      |
| 137        | GRB2             | mmu-miR-466f-3p      | 16.95           | 73             | mmu-miR-466f-3p (GRB2)    |
| 148        | GRB2             | mmu-miR-467f         | 9.05            | 21             | mmu-miR-467f (GRB2)       |
| 1          | IL6              | mmu-let-7a           | 19.58           | 74             | mmu-let-7a (IL6)          |
| 3          | IL6              | mmu-let-7b           | 28.65           | 141            | mmu-let-7b (IL6)          |
| 4          | IL6              | mmu-let-7c           | 22.49           | 96             | mmu-let-7c (IL6)          |
| 7          | IL6              | mmu-let-7e           | 19.62           | 78             | mmu-let-7e (IL6)          |

|     |        |               |        |       |                       |
|-----|--------|---------------|--------|-------|-----------------------|
| 10  | IL6    | mmu-let-7i    | 20.96  | 84    | mmu-let-7i (IL6)      |
| 44  | IL6    | mmu-miR-181a  | 11.79  | 30    | mmu-miR-181a (IL6)    |
| 45  | IL6    | mmu-miR-181b  | 11.04  | 22    | mmu-miR-181b (IL6)    |
| 13  | JAK1   | mmu-miR-106a  | 14.51  | 57    | mmu-miR-106a (JAK1)   |
| 43  | JAK1   | mmu-miR-17    | 42.24  | 185   | mmu-miR-17 (JAK1)     |
| 75  | JAK1   | mmu-miR-20a   | 34.05  | 133   | mmu-miR-20a (JAK1)    |
| 125 | JAK1   | mmu-miR-3473a | 645.00 | 645   | mmu-miR-3473a (JAK1)  |
| 40  | MAP2K1 | mmu-miR-15b   | 22.88  | 76    | mmu-miR-15b (MAP2K1)  |
| 42  | MAP2K1 | mmu-miR-16    | 50.16  | 262   | mmu-miR-16 (MAP2K1)   |
| 44  | MAP2K1 | mmu-miR-181a  | 48.03  | 222   | mmu-miR-181a (MAP2K1) |
| 45  | MAP2K1 | mmu-miR-181b  | 87.59  | 389   | mmu-miR-181b (MAP2K1) |
| 73  | MAP2K1 | mmu-miR-19b   | 583.00 | 583   | mmu-miR-19b (MAP2K1)  |
| 30  | MAPK3  | mmu-miR-138*  | 470.00 | 470   | mmu-miR-138* (MAPK3)  |
| 41  | MAPK3  | mmu-miR-16*   | 279.50 | 279.5 | mmu-miR-16* (MAPK3)   |
| 59  | PTPN11 | mmu-miR-1935  | 25.98  | 45    | mmu-miR-1935 (PTPN11) |
| 42  | RAF1   | mmu-miR-16    | 57.03  | 302   | mmu-miR-16 (RAF1)     |
| 73  | RAF1   | mmu-miR-19b   | 273.00 | 273   | mmu-miR-19b (RAF1)    |
| 172 | SHC1   | mmu-miR-674   | 16.28  | 96    | mmu-miR-674 (SHC1)    |
| 43  | SOS1   | mmu-miR-17    | 56.08  | 269   | mmu-miR-17 (SOS1)     |
| 44  | SOS1   | mmu-miR-181a  | 58.55  | 279   | mmu-miR-181a (SOS1)   |
| 45  | SOS1   | mmu-miR-181b  | 36.15  | 156   | mmu-miR-181b (SOS1)   |
| 75  | SOS1   | mmu-miR-20a   | 32.95  | 128   | mmu-miR-20a (SOS1)    |
| 197 | SOS1   | mmu-miR-93    | 27.84  | 101   | mmu-miR-93 (SOS1)     |
| 142 | SRF    | mmu-miR-466i  | 19.97  | 77    | mmu-miR-466i (SRF)    |
| 189 | SRF    | mmu-miR-762   | 16.03  | 79    | mmu-miR-762 (SRF)     |
| 43  | STAT3  | mmu-miR-17    | 49.66  | 233   | mmu-miR-17 (STAT3)    |
| 75  | STAT3  | mmu-miR-20a   | 53.60  | 265   | mmu-miR-20a (STAT3)   |
| 174 | STAT3  | mmu-miR-690   | 8.28   | 45    | mmu-miR-690 (STAT3)   |
| 197 | STAT3  | mmu-miR-93    | 45.91  | 212   | mmu-miR-93 (STAT3)    |
| 1   | TYK2   | mmu-let-7a    | 8.27   | 12    | mmu-let-7a (TYK2)     |
| 3   | TYK2   | mmu-let-7b    | 9.28   | 22    | mmu-let-7b (TYK2)     |
| 4   | TYK2   | mmu-let-7c    | 8.28   | 13    | mmu-let-7c (TYK2)     |
| 6   | TYK2   | mmu-let-7d    | 4.99   | 15    | mmu-let-7d (TYK2)     |
| 7   | TYK2   | mmu-let-7e    | 7.03   | 15    | mmu-let-7e (TYK2)     |
| 10  | TYK2   | mmu-let-7i    | 8.61   | 17    | mmu-let-7i (TYK2)     |

| Pathway ID | Adjusted P-value | Pathway Name                                         |                 |                |                           |
|------------|------------------|------------------------------------------------------|-----------------|----------------|---------------------------|
| 739        | 0.007992         | REACTOME_TRAFFICKING_AND_PROCESSING_OF_ENDOSOMAL_TLR |                 |                |                           |
| ASSAY ID   | Entrez Gene ID   | miRNA Name                                           | miRNApath Score | miRNApath Rank | miRNA - Gene              |
| 59         | CNPY3            | mmu-miR-1935                                         | 64.41           | 159            | mmu-miR-1935 (CNPY3)      |
| 195        | CTSS             | mmu-miR-92a                                          | 598.50          | 598.5          | mmu-miR-92a (CTSS)        |
| 44         | HSP90B1          | mmu-miR-181a                                         | 22.65           | 80             | mmu-miR-181a (HSP90B1)    |
| 45         | HSP90B1          | mmu-miR-181b                                         | 47.04           | 218            | mmu-miR-181b (HSP90B1)    |
| 137        | HSP90B1          | mmu-miR-466f-3p                                      | 21.20           | 96             | mmu-miR-466f-3p (HSP90B1) |
| 148        | HSP90B1          | mmu-miR-467f                                         | 20.29           | 90             | mmu-miR-467f (HSP90B1)    |

| Pathway ID | Adjusted P-value | Pathway Name          |                 |                |                      |
|------------|------------------|-----------------------|-----------------|----------------|----------------------|
| 71         | 0.00999          | KEGG_ABC_TRANSPORTERS |                 |                |                      |
| ASSAY ID   | Entrez Gene ID   | miRNA Name            | miRNApath Score | miRNApath Rank | miRNA - Gene         |
| 43         | ABCA1            | mmu-miR-17            | 25.84           | 92             | mmu-miR-17 (ABCA1)   |
| 75         | ABCA1            | mmu-miR-20a           | 31.28           | 120            | mmu-miR-20a (ABCA1)  |
| 197        | ABCA1            | mmu-miR-93            | 32.86           | 131            | mmu-miR-93 (ABCA1)   |
| 74         | ABCA2            | mmu-miR-207           | 10.49           | 66             | mmu-miR-207 (ABCA2)  |
| 73         | ABCA5            | mmu-miR-19b           | 594.50          | 594.5          | mmu-miR-19b (ABCA5)  |
| 96         | ABCA5            | mmu-miR-26a           | 7.02            | 13             | mmu-miR-26a (ABCA5)  |
| 30         | ABCA6            | mmu-miR-138*          | 331.50          | 331.5          | mmu-miR-138* (ABCA6) |
| 46         | ABCB7            | mmu-miR-1892          | 9.91            | 38             | mmu-miR-1892 (ABCB7) |
| 73         | ABCB7            | mmu-miR-19b           | 2.00            | 2              | mmu-miR-19b (ABCB7)  |
| 1          | ABCB9            | mmu-let-7a            | 23.04           | 108            | mmu-let-7a (ABCB9)   |
| 3          | ABCB9            | mmu-let-7b            | 29.46           | 144            | mmu-let-7b (ABCB9)   |
| 4          | ABCB9            | mmu-let-7c            | 23.84           | 107            | mmu-let-7c (ABCB9)   |
| 6          | ABCB9            | mmu-let-7d            | 15.59           | 76             | mmu-let-7d (ABCB9)   |
| 7          | ABCB9            | mmu-let-7e            | 53.76           | 266            | mmu-let-7e (ABCB9)   |
| 10         | ABCB9            | mmu-let-7i            | 26.81           | 131            | mmu-let-7i (ABCB9)   |
| 112        | ABCB9            | mmu-miR-31            | 13.08           | 80             | mmu-miR-31 (ABCB9)   |
| 182        | ABCC1            | mmu-miR-709           | 33.46           | 197            | mmu-miR-709 (ABCC1)  |
| 1          | ABCC10           | mmu-let-7a            | 68.83           | 307            | mmu-let-7a (ABCC10)  |
| 3          | ABCC10           | mmu-let-7b            | 70.08           | 312            | mmu-let-7b (ABCC10)  |
| 4          | ABCC10           | mmu-let-7c            | 70.14           | 322            | mmu-let-7c (ABCC10)  |
| 7          | ABCC10           | mmu-let-7e            | 66.90           | 295            | mmu-let-7e (ABCC10)  |
| 10         | ABCC10           | mmu-let-7i            | 66.00           | 309            | mmu-let-7i (ABCC10)  |
| 121        | ABCC12           | mmu-miR-346           | 3.17            | 19             | mmu-miR-346 (ABCC12) |
| 12         | ABCC3            | mmu-miR-103           | 262.00          | 262            | mmu-miR-103 (ABCC3)  |
| 94         | ABCC3            | mmu-miR-24            | 504.00          | 504            | mmu-miR-24 (ABCC3)   |
| 182        | ABCC3            | mmu-miR-709           | 31.35           | 187            | mmu-miR-709 (ABCC3)  |



|     |       |                 |        |     |                         |
|-----|-------|-----------------|--------|-----|-------------------------|
| 96  | ABCC4 | mmu-miR-26a     | 63.73  | 294 | mmu-miR-26a (ABCC4)     |
| 1   | ABCC5 | mmu-let-7a      | 31.86  | 162 | mmu-let-7a (ABCC5)      |
| 3   | ABCC5 | mmu-let-7b      | 51.57  | 273 | mmu-let-7b (ABCC5)      |
| 4   | ABCC5 | mmu-let-7c      | 52.40  | 283 | mmu-let-7c (ABCC5)      |
| 7   | ABCC5 | mmu-let-7e      | 18.49  | 70  | mmu-let-7e (ABCC5)      |
| 10  | ABCC5 | mmu-let-7i      | 27.82  | 140 | mmu-let-7i (ABCC5)      |
| 24  | ABCC5 | mmu-miR-125b-5p | 6.12   | 9   | mmu-miR-125b-5p (ABCC5) |
| 94  | ABCD1 | mmu-miR-24      | 392.00 | 392 | mmu-miR-24 (ABCD1)      |
| 162 | ABCD2 | mmu-miR-669b    | 23.59  | 128 | mmu-miR-669b (ABCD2)    |
| 137 | ABCD3 | mmu-miR-466f-3p | 10.97  | 34  | mmu-miR-466f-3p (ABCD3) |
| 40  | ABCG4 | mmu-miR-15b     | 73.85  | 383 | mmu-miR-15b (ABCG4)     |
| 42  | ABCG4 | mmu-miR-16      | 81.58  | 403 | mmu-miR-16 (ABCG4)      |
| 189 | ABCG4 | mmu-miR-762     | 15.31  | 76  | mmu-miR-762 (ABCG4)     |
| 41  | ABCG5 | mmu-miR-16*     | 183.00 | 183 | mmu-miR-16* (ABCG5)     |
| 94  | TAP2  | mmu-miR-24      | 230.00 | 230 | mmu-miR-24 (TAP2)       |

| Pathway ID | Adjusted P-value | Pathway Name                             |                 |                |                           |
|------------|------------------|------------------------------------------|-----------------|----------------|---------------------------|
| 123        | 0.00999          | KEGG_NOD_LIKE_RECEPTOR_SIGNALING_PATHWAY |                 |                |                           |
| ASSAY ID   | Entrez Gene ID   | miRNA Name                               | miRNApath Score | miRNApath Rank | miRNA - Gene              |
| 94         | CARD9            | mmu-miR-24                               | 557.00          | 557            | mmu-miR-24 (CARD9)        |
| 12         | CASP1            | mmu-miR-103                              | 429.50          | 429.5          | mmu-miR-103 (CASP1)       |
| 13         | CASP8            | mmu-miR-106a                             | 9.36            | 35             | mmu-miR-106a (CASP8)      |
| 43         | CASP8            | mmu-miR-17                               | 18.29           | 53             | mmu-miR-17 (CASP8)        |
| 75         | CASP8            | mmu-miR-20a                              | 20.25           | 63             | mmu-miR-20a (CASP8)       |
| 73         | CCL11            | mmu-miR-19b                              | 137.00          | 137            | mmu-miR-19b (CCL11)       |
| 195        | CCL7             | mmu-miR-92a                              | 703.00          | 703            | mmu-miR-92a (CCL7)        |
| 94         | HSP90AB1         | mmu-miR-24                               | 144.00          | 144            | mmu-miR-24 (HSP90AB1)     |
| 44         | HSP90B1          | mmu-miR-181a                             | 22.65           | 80             | mmu-miR-181a (HSP90B1)    |
| 45         | HSP90B1          | mmu-miR-181b                             | 47.04           | 218            | mmu-miR-181b (HSP90B1)    |
| 137        | HSP90B1          | mmu-miR-466f-3p                          | 21.20           | 96             | mmu-miR-466f-3p (HSP90B1) |
| 148        | HSP90B1          | mmu-miR-467f                             | 20.29           | 90             | mmu-miR-467f (HSP90B1)    |
| 1          | IL6              | mmu-let-7a                               | 19.58           | 74             | mmu-let-7a (IL6)          |
| 3          | IL6              | mmu-let-7b                               | 28.65           | 141            | mmu-let-7b (IL6)          |
| 4          | IL6              | mmu-let-7c                               | 22.49           | 96             | mmu-let-7c (IL6)          |
| 7          | IL6              | mmu-let-7e                               | 19.62           | 78             | mmu-let-7e (IL6)          |
| 10         | IL6              | mmu-let-7i                               | 20.96           | 84             | mmu-let-7i (IL6)          |
| 44         | IL6              | mmu-miR-181a                             | 11.79           | 30             | mmu-miR-181a (IL6)        |
| 45         | IL6              | mmu-miR-181b                             | 11.04           | 22             | mmu-miR-181b (IL6)        |
| 44         | MAPK1            | mmu-miR-181a                             | 60.89           | 287            | mmu-miR-181a (MAPK1)      |
| 45         | MAPK1            | mmu-miR-181b                             | 66.76           | 315            | mmu-miR-181b (MAPK1)      |
| 140        | MAPK10           | mmu-miR-466g                             | 4.43            | 8              | mmu-miR-466g (MAPK10)     |

|     |        |                 |        |       |                          |
|-----|--------|-----------------|--------|-------|--------------------------|
| 30  | MAPK12 | mmu-miR-138*    | 126.00 | 126   | mmu-miR-138* (MAPK12)    |
| 171 | MAPK12 | mmu-miR-671-5p  | 17.81  | 87    | mmu-miR-671-5p (MAPK12)  |
| 49  | MAPK14 | mmu-miR-1894-5p | 1.91   | 3     | mmu-miR-1894-5p (MAPK14) |
| 30  | MAPK3  | mmu-miR-138*    | 470.00 | 470   | mmu-miR-138* (MAPK3)     |
| 41  | MAPK3  | mmu-miR-16*     | 279.50 | 279.5 | mmu-miR-16* (MAPK3)      |
| 1   | MAPK8  | mmu-let-7a      | 48.26  | 253   | mmu-let-7a (MAPK8)       |
| 3   | MAPK8  | mmu-let-7b      | 41.97  | 225   | mmu-let-7b (MAPK8)       |
| 4   | MAPK8  | mmu-let-7c      | 28.92  | 138   | mmu-let-7c (MAPK8)       |
| 7   | MAPK8  | mmu-let-7e      | 43.62  | 228   | mmu-let-7e (MAPK8)       |
| 10  | MAPK8  | mmu-let-7i      | 34.44  | 186   | mmu-let-7i (MAPK8)       |
| 12  | MAPK8  | mmu-miR-103     | 635.00 | 635   | mmu-miR-103 (MAPK8)      |
| 27  | MAPK8  | mmu-miR-130b    | 15.92  | 71    | mmu-miR-130b (MAPK8)     |
| 40  | MAPK8  | mmu-miR-15b     | 16.83  | 41    | mmu-miR-15b (MAPK8)      |
| 42  | MAPK8  | mmu-miR-16      | 15.16  | 38    | mmu-miR-16 (MAPK8)       |
| 68  | MAPK8  | mmu-miR-1949    | 8.17   | 41    | mmu-miR-1949 (MAPK8)     |
| 162 | MAPK8  | mmu-miR-669b    | 4.82   | 11    | mmu-miR-669b (MAPK8)     |
| 12  | MAPK9  | mmu-miR-103     | 348.50 | 348.5 | mmu-miR-103 (MAPK9)      |
| 43  | MAPK9  | mmu-miR-17      | 40.15  | 168   | mmu-miR-17 (MAPK9)       |
| 75  | MAPK9  | mmu-miR-20a     | 66.01  | 326   | mmu-miR-20a (MAPK9)      |
| 197 | MAPK9  | mmu-miR-93      | 27.83  | 100   | mmu-miR-93 (MAPK9)       |
| 195 | NFKB1  | mmu-miR-92a     | 293.00 | 293   | mmu-miR-92a (NFKB1)      |
| 73  | NFKBIA | mmu-miR-19b     | 80.00  | 80    | mmu-miR-19b (NFKBIA)     |
| 94  | PYCARD | mmu-miR-24      | 396.00 | 396   | mmu-miR-24 (PYCARD)      |
| 94  | TAB1   | mmu-miR-24      | 664.00 | 664   | mmu-miR-24 (TAB1)        |
| 40  | TAB3   | mmu-miR-15b     | 59.30  | 309   | mmu-miR-15b (TAB3)       |
| 42  | TAB3   | mmu-miR-16      | 48.68  | 248   | mmu-miR-16 (TAB3)        |
| 44  | TAB3   | mmu-miR-181a    | 44.97  | 204   | mmu-miR-181a (TAB3)      |
| 45  | TAB3   | mmu-miR-181b    | 78.84  | 367   | mmu-miR-181b (TAB3)      |
| 96  | TAB3   | mmu-miR-26a     | 55.56  | 269   | mmu-miR-26a (TAB3)       |
| 189 | TNF    | mmu-miR-762     | 39.09  | 236   | mmu-miR-762 (TNF)        |
| 195 | TNF    | mmu-miR-92a     | 422.00 | 422   | mmu-miR-92a (TNF)        |
| 44  | XIAP   | mmu-miR-181a    | 29.74  | 118   | mmu-miR-181a (XIAP)      |
| 45  | XIAP   | mmu-miR-181b    | 32.46  | 137   | mmu-miR-181b (XIAP)      |
| 75  | XIAP   | mmu-miR-20a     | 34.64  | 138   | mmu-miR-20a (XIAP)       |

| Pathway ID | Adjusted P-value | Pathway Name     |                 |                |                      |
|------------|------------------|------------------|-----------------|----------------|----------------------|
| 417        | 0.00999          | ST_IL_13_PATHWAY |                 |                |                      |
| ASSAY ID   | Entrez Gene ID   | miRNA Name       | miRNApath Score | miRNApath Rank | miRNA - Gene         |
| 1          | IL13             | mmu-let-7a       | 9.82            | 21             | mmu-let-7a (IL13)    |
| 3          | IL13             | mmu-let-7b       | 9.16            | 20             | mmu-let-7b (IL13)    |
| 4          | IL13             | mmu-let-7c       | 12.38           | 33             | mmu-let-7c (IL13)    |
| 6          | IL13             | mmu-let-7d       | 7.88            | 39             | mmu-let-7d (IL13)    |
| 7          | IL13             | mmu-let-7e       | 12.99           | 38             | mmu-let-7e (IL13)    |
| 10         | IL13             | mmu-let-7i       | 17.99           | 64             | mmu-let-7i (IL13)    |
| 13         | JAK1             | mmu-miR-106a     | 14.51           | 57             | mmu-miR-106a (JAK1)  |
| 43         | JAK1             | mmu-miR-17       | 42.24           | 185            | mmu-miR-17 (JAK1)    |
| 75         | JAK1             | mmu-miR-20a      | 34.05           | 133            | mmu-miR-20a (JAK1)   |
| 125        | JAK1             | mmu-miR-3473a    | 645.00          | 645            | mmu-miR-3473a (JAK1) |
| 1          | TYK2             | mmu-let-7a       | 8.27            | 12             | mmu-let-7a (TYK2)    |
| 3          | TYK2             | mmu-let-7b       | 9.28            | 22             | mmu-let-7b (TYK2)    |
| 4          | TYK2             | mmu-let-7c       | 8.28            | 13             | mmu-let-7c (TYK2)    |
| 6          | TYK2             | mmu-let-7d       | 4.99            | 15             | mmu-let-7d (TYK2)    |
| 7          | TYK2             | mmu-let-7e       | 7.03            | 15             | mmu-let-7e (TYK2)    |
| 10         | TYK2             | mmu-let-7i       | 8.61            | 17             | mmu-let-7i (TYK2)    |

| Pathway ID | Adjusted P-value | Pathway Name                |                 |                |                         |
|------------|------------------|-----------------------------|-----------------|----------------|-------------------------|
| 679        | 0.00999          | REACTOME_SIGNALING_BY_NODAL |                 |                |                         |
| ASSAY ID   | Entrez Gene ID   | miRNA Name                  | miRNApath Score | miRNApath Rank | miRNA - Gene            |
| 1          | ACVR1C           | mmu-let-7a                  | 20.83           | 88             | mmu-let-7a (ACVR1C)     |
| 3          | ACVR1C           | mmu-let-7b                  | 19.34           | 76             | mmu-let-7b (ACVR1C)     |
| 4          | ACVR1C           | mmu-let-7c                  | 18.56           | 68             | mmu-let-7c (ACVR1C)     |
| 7          | ACVR1C           | mmu-let-7e                  | 15.12           | 51             | mmu-let-7e (ACVR1C)     |
| 10         | ACVR1C           | mmu-let-7i                  | 18.06           | 65             | mmu-let-7i (ACVR1C)     |
| 44         | ACVR1C           | mmu-miR-181a                | 41.75           | 187            | mmu-miR-181a (ACVR1C)   |
| 45         | ACVR1C           | mmu-miR-181b                | 22.76           | 86             | mmu-miR-181b (ACVR1C)   |
| 96         | ACVR1C           | mmu-miR-26a                 | 23.59           | 107            | mmu-miR-26a (ACVR1C)    |
| 40         | ACVR2A           | mmu-miR-15b                 | 17.45           | 46             | mmu-miR-15b (ACVR2A)    |
| 42         | ACVR2A           | mmu-miR-16                  | 19.24           | 58             | mmu-miR-16 (ACVR2A)     |
| 171        | ACVR2A           | mmu-miR-671-5p              | 16.30           | 82             | mmu-miR-671-5p (ACVR2A) |
| 172        | ACVR2B           | mmu-miR-674                 | 7.48            | 31             | mmu-miR-674 (ACVR2B)    |
| 43         | FURIN            | mmu-miR-17                  | 61.46           | 298            | mmu-miR-17 (FURIN)      |
| 75         | FURIN            | mmu-miR-20a                 | 71.04           | 351            | mmu-miR-20a (FURIN)     |
| 197        | FURIN            | mmu-miR-93                  | 53.60           | 250            | mmu-miR-93 (FURIN)      |
| 30         | LEFTY1           | mmu-miR-138*                | 20.00           | 20             | mmu-miR-138* (LEFTY1)   |

|     |        |              |        |     |                      |
|-----|--------|--------------|--------|-----|----------------------|
| 41  | LEFTY1 | mmu-miR-16*  | 10.00  | 10  | mmu-miR-16* (LEFTY1) |
| 94  | LEFTY1 | mmu-miR-24   | 410.00 | 410 | mmu-miR-24 (LEFTY1)  |
| 121 | NODAL  | mmu-miR-346  | 2.94   | 14  | mmu-miR-346 (NODAL)  |
| 30  | PCSK6  | mmu-miR-138* | 96.00  | 96  | mmu-miR-138* (PCSK6) |
| 185 | PCSK6  | mmu-miR-714  | 1.95   | 8   | mmu-miR-714 (PCSK6)  |
| 12  | SMAD2  | mmu-miR-103  | 198.00 | 198 | mmu-miR-103 (SMAD2)  |
| 42  | SMAD3  | mmu-miR-16   | 102.41 | 475 | mmu-miR-16 (SMAD3)   |
| 96  | SMAD4  | mmu-miR-26a  | 82.26  | 317 | mmu-miR-26a (SMAD4)  |

Pathway ID      Adjusted P-value      Pathway Name  
99      0.011988      KEGG\_LYSOSOME

| ASSAY ID | Entrez Gene ID | miRNA Name     | miRNApath Score | miRNApath Rank | miRNA - Gene           |
|----------|----------------|----------------|-----------------|----------------|------------------------|
| 74       | ABCA2          | mmu-miR-207    | 10.49           | 66             | mmu-miR-207 (ABCA2)    |
| 1        | ABCB9          | mmu-let-7a     | 23.04           | 108            | mmu-let-7a (ABCB9)     |
| 3        | ABCB9          | mmu-let-7b     | 29.46           | 144            | mmu-let-7b (ABCB9)     |
| 4        | ABCB9          | mmu-let-7c     | 23.84           | 107            | mmu-let-7c (ABCB9)     |
| 6        | ABCB9          | mmu-let-7d     | 15.59           | 76             | mmu-let-7d (ABCB9)     |
| 7        | ABCB9          | mmu-let-7e     | 53.76           | 266            | mmu-let-7e (ABCB9)     |
| 10       | ABCB9          | mmu-let-7i     | 26.81           | 131            | mmu-let-7i (ABCB9)     |
| 112      | ABCB9          | mmu-miR-31     | 13.08           | 80             | mmu-miR-31 (ABCB9)     |
| 182      | ACP2           | mmu-miR-709    | 41.48           | 236            | mmu-miR-709 (ACP2)     |
| 189      | ACP2           | mmu-miR-762    | 30.57           | 190            | mmu-miR-762 (ACP2)     |
| 18       | AP1G1          | mmu-miR-1187   | 5.82            | 17             | mmu-miR-1187 (AP1G1)   |
| 56       | AP1G1          | mmu-miR-191    | 2.81            | 20             | mmu-miR-191 (AP1G1)    |
| 180      | AP1G1          | mmu-miR-705    | 4.49            | 4              | mmu-miR-705 (AP1G1)    |
| 12       | AP1M1          | mmu-miR-103    | 564.00          | 564            | mmu-miR-103 (AP1M1)    |
| 157      | AP1M1          | mmu-miR-574-5p | 10.72           | 55             | mmu-miR-574-5p (AP1M1) |
| 189      | AP1M1          | mmu-miR-762    | 32.10           | 200            | mmu-miR-762 (AP1M1)    |
| 94       | AP1M2          | mmu-miR-24     | 62.00           | 62             | mmu-miR-24 (AP1M2)     |
| 171      | AP1M2          | mmu-miR-671-5p | 12.09           | 51             | mmu-miR-671-5p (AP1M2) |
| 1        | AP1S1          | mmu-let-7a     | 18.75           | 70             | mmu-let-7a (AP1S1)     |
| 3        | AP1S1          | mmu-let-7b     | 17.25           | 62             | mmu-let-7b (AP1S1)     |
| 4        | AP1S1          | mmu-let-7c     | 18.42           | 66             | mmu-let-7c (AP1S1)     |
| 6        | AP1S1          | mmu-let-7d     | 5.63            | 18             | mmu-let-7d (AP1S1)     |
| 7        | AP1S1          | mmu-let-7e     | 16.74           | 58             | mmu-let-7e (AP1S1)     |
| 10       | AP1S1          | mmu-let-7i     | 19.58           | 73             | mmu-let-7i (AP1S1)     |
| 59       | AP1S1          | mmu-miR-1935   | 33.57           | 77             | mmu-miR-1935 (AP1S1)   |
| 12       | AP1S2          | mmu-miR-103    | 702.00          | 702            | mmu-miR-103 (AP1S2)    |
| 12       | AP3B1          | mmu-miR-103    | 52.00           | 52             | mmu-miR-103 (AP3B1)    |
| 38       | AP3B1          | mmu-miR-151-5p | 1.53            | 7              | mmu-miR-151-5p (AP3B1) |
| 42       | AP3B1          | mmu-miR-16     | 54.79           | 291            | mmu-miR-16 (AP3B1)     |

|     |          |                 |        |       |                        |
|-----|----------|-----------------|--------|-------|------------------------|
| 12  | AP3D1    | mmu-miR-103     | 661.00 | 661   | mmu-miR-103 (AP3D1)    |
| 195 | AP3D1    | mmu-miR-92a     | 182.00 | 182   | mmu-miR-92a (AP3D1)    |
| 172 | AP3S1    | mmu-miR-674     | 5.95   | 21    | mmu-miR-674 (AP3S1)    |
| 125 | AP3S2    | mmu-miR-3473a   | 239.00 | 239   | mmu-miR-3473a (AP3S2)  |
| 12  | AP4B1    | mmu-miR-103     | 675.00 | 675   | mmu-miR-103 (AP4B1)    |
| 195 | ASAH1    | mmu-miR-92a     | 130.50 | 130.5 | mmu-miR-92a (ASAH1)    |
| 12  | ATP6V0A4 | mmu-miR-103     | 382.00 | 382   | mmu-miR-103 (ATP6V0A4) |
| 195 | ATP6V0A4 | mmu-miR-92a     | 285.00 | 285   | mmu-miR-92a (ATP6V0A4) |
| 189 | ATP6V0B  | mmu-miR-762     | 13.11  | 55    | mmu-miR-762 (ATP6V0B)  |
| 180 | ATP6V0C  | mmu-miR-705     | 10.11  | 61    | mmu-miR-705 (ATP6V0C)  |
| 195 | ATP6V0C  | mmu-miR-92a     | 397.50 | 397.5 | mmu-miR-92a (ATP6V0C)  |
| 189 | ATP6V0D1 | mmu-miR-762     | 28.33  | 175   | mmu-miR-762 (ATP6V0D1) |
| 40  | CD164    | mmu-miR-15b     | 82.99  | 419   | mmu-miR-15b (CD164)    |
| 42  | CD164    | mmu-miR-16      | 93.86  | 460   | mmu-miR-16 (CD164)     |
| 172 | CLTA     | mmu-miR-674     | 6.45   | 25    | mmu-miR-674 (CLTA)     |
| 189 | CLTB     | mmu-miR-762     | 18.05  | 92    | mmu-miR-762 (CLTB)     |
| 157 | CTSD     | mmu-miR-574-5p  | 2.84   | 3     | mmu-miR-574-5p (CTSD)  |
| 142 | CTSE     | mmu-miR-466i    | 12.83  | 47    | mmu-miR-466i (CTSE)    |
| 137 | CTSH     | mmu-miR-466f-3p | 25.76  | 125   | mmu-miR-466f-3p (CTSH) |
| 195 | CTSS     | mmu-miR-92a     | 598.50 | 598.5 | mmu-miR-92a (CTSS)     |
| 180 | CTSW     | mmu-miR-705     | 11.41  | 76    | mmu-miR-705 (CTSW)     |
| 94  | CTSZ     | mmu-miR-24      | 93.00  | 93    | mmu-miR-24 (CTSZ)      |
| 94  | GGA1     | mmu-miR-24      | 505.00 | 505   | mmu-miR-24 (GGA1)      |
| 189 | GGA1     | mmu-miR-762     | 13.73  | 58    | mmu-miR-762 (GGA1)     |
| 24  | GGA2     | mmu-miR-125b-5p | 16.43  | 57    | mmu-miR-125b-5p (GGA2) |
| 182 | GGA2     | mmu-miR-709     | 24.38  | 149   | mmu-miR-709 (GGA2)     |
| 1   | GGA3     | mmu-let-7a      | 23.26  | 110   | mmu-let-7a (GGA3)      |
| 3   | GGA3     | mmu-let-7b      | 19.01  | 72    | mmu-let-7b (GGA3)      |
| 4   | GGA3     | mmu-let-7c      | 19.89  | 77    | mmu-let-7c (GGA3)      |
| 6   | GGA3     | mmu-let-7d      | 8.93   | 44    | mmu-let-7d (GGA3)      |
| 7   | GGA3     | mmu-let-7e      | 38.46  | 206   | mmu-let-7e (GGA3)      |
| 10  | GGA3     | mmu-let-7i      | 27.25  | 134   | mmu-let-7i (GGA3)      |
| 30  | GGA3     | mmu-miR-138*    | 62.00  | 62    | mmu-miR-138* (GGA3)    |
| 40  | GGA3     | mmu-miR-15b     | 51.94  | 262   | mmu-miR-15b (GGA3)     |
| 42  | GGA3     | mmu-miR-16      | 82.24  | 405   | mmu-miR-16 (GGA3)      |
| 195 | GLA      | mmu-miR-92a     | 300.00 | 300   | mmu-miR-92a (GLA)      |
| 94  | GLB1     | mmu-miR-24      | 15.00  | 15    | mmu-miR-24 (GLB1)      |
| 1   | GNPTAB   | mmu-let-7a      | 42.75  | 221   | mmu-let-7a (GNPTAB)    |
| 3   | GNPTAB   | mmu-let-7b      | 38.45  | 209   | mmu-let-7b (GNPTAB)    |
| 4   | GNPTAB   | mmu-let-7c      | 40.27  | 215   | mmu-let-7c (GNPTAB)    |
| 7   | GNPTAB   | mmu-let-7e      | 38.19  | 204   | mmu-let-7e (GNPTAB)    |
| 10  | GNPTAB   | mmu-let-7i      | 44.93  | 236   | mmu-let-7i (GNPTAB)    |
| 1   | GNS      | mmu-let-7a      | 25.82  | 128   | mmu-let-7a (GNS)       |

|     |         |                |        |       |                        |
|-----|---------|----------------|--------|-------|------------------------|
| 3   | GNS     | mmu-let-7b     | 26.50  | 127   | mmu-let-7b (GNS)       |
| 4   | GNS     | mmu-let-7c     | 26.22  | 126   | mmu-let-7c (GNS)       |
| 7   | GNS     | mmu-let-7e     | 22.88  | 101   | mmu-let-7e (GNS)       |
| 10  | GNS     | mmu-let-7i     | 26.01  | 126   | mmu-let-7i (GNS)       |
| 94  | HEXA    | mmu-miR-24     | 230.00 | 230   | mmu-miR-24 (HEXA)      |
| 40  | IGF2R   | mmu-miR-15b    | 90.59  | 447   | mmu-miR-15b (IGF2R)    |
| 42  | IGF2R   | mmu-miR-16     | 86.60  | 429   | mmu-miR-16 (IGF2R)     |
| 125 | IGF2R   | mmu-miR-3473a  | 387.00 | 387   | mmu-miR-3473a (IGF2R)  |
| 16  | LAMP2   | mmu-miR-107    | 6.61   | 25    | mmu-miR-107 (LAMP2)    |
| 103 | LAMP2   | mmu-miR-297a   | 1.60   | 2     | mmu-miR-297a (LAMP2)   |
| 13  | LAPTM4A | mmu-miR-106a   | 12.53  | 49    | mmu-miR-106a (LAPTM4A) |
| 43  | LAPTM4A | mmu-miR-17     | 34.18  | 134   | mmu-miR-17 (LAPTM4A)   |
| 73  | LAPTM4A | mmu-miR-19b    | 627.00 | 627   | mmu-miR-19b (LAPTM4A)  |
| 75  | LAPTM4A | mmu-miR-20a    | 39.21  | 162   | mmu-miR-20a (LAPTM4A)  |
| 197 | LAPTM4A | mmu-miR-93     | 61.86  | 295   | mmu-miR-93 (LAPTM4A)   |
| 43  | M6PR    | mmu-miR-17     | 110.58 | 443   | mmu-miR-17 (M6PR)      |
| 75  | M6PR    | mmu-miR-20a    | 119.83 | 457   | mmu-miR-20a (M6PR)     |
| 197 | M6PR    | mmu-miR-93     | 126.86 | 447   | mmu-miR-93 (M6PR)      |
| 38  | MANBA   | mmu-miR-151-5p | 2.07   | 9     | mmu-miR-151-5p (MANBA) |
| 94  | NAGA    | mmu-miR-24     | 645.50 | 645.5 | mmu-miR-24 (NAGA)      |
| 94  | NEU1    | mmu-miR-24     | 650.00 | 650   | mmu-miR-24 (NEU1)      |
| 40  | PLA2G15 | mmu-miR-15b    | 109.11 | 494   | mmu-miR-15b (PLA2G15)  |
| 42  | PLA2G15 | mmu-miR-16     | 75.85  | 383   | mmu-miR-16 (PLA2G15)   |
| 189 | PPT2    | mmu-miR-762    | 12.05  | 48    | mmu-miR-762 (PPT2)     |
| 44  | PSAP    | mmu-miR-181a   | 80.26  | 358   | mmu-miR-181a (PSAP)    |
| 94  | SCARB2  | mmu-miR-24     | 467.00 | 467   | mmu-miR-24 (SCARB2)    |
| 40  | SMPD1   | mmu-miR-15b    | 42.08  | 202   | mmu-miR-15b (SMPD1)    |
| 42  | SMPD1   | mmu-miR-16     | 49.86  | 260   | mmu-miR-16 (SMPD1)     |
| 125 | SORT1   | mmu-miR-3473a  | 373.00 | 373   | mmu-miR-3473a (SORT1)  |
| 182 | SORT1   | mmu-miR-709    | 25.35  | 157   | mmu-miR-709 (SORT1)    |
| 43  | SUMF1   | mmu-miR-17     | 66.07  | 327   | mmu-miR-17 (SUMF1)     |
| 59  | SUMF1   | mmu-miR-1935   | 76.55  | 174   | mmu-miR-1935 (SUMF1)   |
| 75  | SUMF1   | mmu-miR-20a    | 87.00  | 408   | mmu-miR-20a (SUMF1)    |
| 197 | SUMF1   | mmu-miR-93     | 57.78  | 271   | mmu-miR-93 (SUMF1)     |

| Pathway ID | Adjusted P-value | Pathway Name           |                 |                |                          |
|------------|------------------|------------------------|-----------------|----------------|--------------------------|
| 401        | 0.011988         | BIOCARTA_VITCB_PATHWAY |                 |                |                          |
| ASSAY ID   | Entrez Gene ID   | miRNA Name             | miRNApath Score | miRNApath Rank | miRNA - Gene             |
| 1          | COL4A2           | mmu-let-7a             | 41.46           | 211            | mmu-let-7a (COL4A2)      |
| 3          | COL4A2           | mmu-let-7b             | 45.53           | 249            | mmu-let-7b (COL4A2)      |
| 4          | COL4A2           | mmu-let-7c             | 46.17           | 248            | mmu-let-7c (COL4A2)      |
| 7          | COL4A2           | mmu-let-7e             | 51.07           | 255            | mmu-let-7e (COL4A2)      |
| 43         | COL4A3           | mmu-miR-17             | 66.99           | 328            | mmu-miR-17 (COL4A3)      |
| 75         | COL4A3           | mmu-miR-20a            | 70.98           | 349            | mmu-miR-20a (COL4A3)     |
| 197        | COL4A3           | mmu-miR-93             | 82.66           | 376            | mmu-miR-93 (COL4A3)      |
| 137        | COL4A5           | mmu-miR-466f-3p        | 11.08           | 36             | mmu-miR-466f-3p (COL4A5) |
| 148        | COL4A5           | mmu-miR-467f           | 13.77           | 43             | mmu-miR-467f (COL4A5)    |
| 139        | P4HB             | mmu-miR-466f           | 3.33            | 19             | mmu-miR-466f (P4HB)      |
| 138        | P4HB             | mmu-miR-466f-5p        | 3.33            | 19             | mmu-miR-466f-5p (P4HB)   |
| 58         | SLC23A2          | mmu-miR-1931           | 21.36           | 81             | mmu-miR-1931 (SLC23A2)   |
| 148        | SLC23A2          | mmu-miR-467f           | 14.59           | 47             | mmu-miR-467f (SLC23A2)   |
| 44         | SLC2A3           | mmu-miR-181a           | 79.45           | 354            | mmu-miR-181a (SLC2A3)    |
| 45         | SLC2A3           | mmu-miR-181b           | 85.85           | 382            | mmu-miR-181b (SLC2A3)    |

| Pathway ID | Adjusted P-value | Pathway Name         |                 |                |                         |
|------------|------------------|----------------------|-----------------|----------------|-------------------------|
| 458        | 0.011988         | PID_AURORA_B_PATHWAY |                 |                |                         |
| ASSAY ID   | Entrez Gene ID   | miRNA Name           | miRNApath Score | miRNApath Rank | miRNA - Gene            |
| 12         | AURKA            | mmu-miR-103          | 326.00          | 326            | mmu-miR-103 (AURKA)     |
| 44         | AURKB            | mmu-miR-181a         | 19.38           | 65             | mmu-miR-181a (AURKB)    |
| 45         | AURKB            | mmu-miR-181b         | 33.07           | 140            | mmu-miR-181b (AURKB)    |
| 137        | AURKB            | mmu-miR-466f-3p      | 20.43           | 91             | mmu-miR-466f-3p (AURKB) |
| 140        | AURKB            | mmu-miR-466g         | 18.39           | 88             | mmu-miR-466g (AURKB)    |
| 73         | BIRC5            | mmu-miR-19b          | 584.50          | 584.5          | mmu-miR-19b (BIRC5)     |
| 195        | BIRC5            | mmu-miR-92a          | 518.00          | 518            | mmu-miR-92a (BIRC5)     |
| 1          | CBX5             | mmu-let-7a           | 19.74           | 77             | mmu-let-7a (CBX5)       |
| 3          | CBX5             | mmu-let-7b           | 25.03           | 115            | mmu-let-7b (CBX5)       |
| 4          | CBX5             | mmu-let-7c           | 22.21           | 94             | mmu-let-7c (CBX5)       |
| 7          | CBX5             | mmu-let-7e           | 17.96           | 67             | mmu-let-7e (CBX5)       |
| 10         | CBX5             | mmu-let-7i           | 24.32           | 111            | mmu-let-7i (CBX5)       |
| 125        | CBX5             | mmu-miR-3473a        | 455.00          | 455            | mmu-miR-3473a (CBX5)    |
| 174        | CBX5             | mmu-miR-690          | 13.05           | 75             | mmu-miR-690 (CBX5)      |
| 182        | CBX5             | mmu-miR-709          | 6.23            | 8              | mmu-miR-709 (CBX5)      |
| 73         | CENPA            | mmu-miR-19b          | 663.00          | 663            | mmu-miR-19b (CENPA)     |
| 44         | CUL3             | mmu-miR-181a         | 79.37           | 353            | mmu-miR-181a (CUL3)     |

|     |        |                 |        |       |                         |
|-----|--------|-----------------|--------|-------|-------------------------|
| 45  | CUL3   | mmu-miR-181b    | 89.55  | 391   | mmu-miR-181b (CUL3)     |
| 30  | INCENP | mmu-miR-138*    | 123.00 | 123   | mmu-miR-138* (INCENP)   |
| 40  | KIF23  | mmu-miR-15b     | 34.66  | 154   | mmu-miR-15b (KIF23)     |
| 42  | KIF23  | mmu-miR-16      | 33.26  | 142   | mmu-miR-16 (KIF23)      |
| 43  | KIF23  | mmu-miR-17      | 41.38  | 182   | mmu-miR-17 (KIF23)      |
| 75  | KIF23  | mmu-miR-20a     | 36.66  | 150   | mmu-miR-20a (KIF23)     |
| 197 | KIF23  | mmu-miR-93      | 49.65  | 229   | mmu-miR-93 (KIF23)      |
| 1   | KLHL13 | mmu-let-7a      | 80.03  | 316   | mmu-let-7a (KLHL13)     |
| 3   | KLHL13 | mmu-let-7b      | 80.76  | 323   | mmu-let-7b (KLHL13)     |
| 4   | KLHL13 | mmu-let-7c      | 80.62  | 327   | mmu-let-7c (KLHL13)     |
| 7   | KLHL13 | mmu-let-7e      | 76.81  | 305   | mmu-let-7e (KLHL13)     |
| 10  | KLHL13 | mmu-let-7i      | 80.57  | 325   | mmu-let-7i (KLHL13)     |
| 18  | KLHL13 | mmu-miR-1187    | 5.90   | 18    | mmu-miR-1187 (KLHL13)   |
| 148 | KLHL13 | mmu-miR-467f    | 55.29  | 207   | mmu-miR-467f (KLHL13)   |
| 182 | KLHL9  | mmu-miR-709     | 46.12  | 250   | mmu-miR-709 (KLHL9)     |
| 94  | PEBP1  | mmu-miR-24      | 255.00 | 255   | mmu-miR-24 (PEBP1)      |
| 30  | PPP1CC | mmu-miR-138*    | 100.50 | 100.5 | mmu-miR-138* (PPP1CC)   |
| 73  | PPP1CC | mmu-miR-19b     | 459.50 | 459.5 | mmu-miR-19b (PPP1CC)    |
| 112 | RASA1  | mmu-miR-31      | 14.90  | 95    | mmu-miR-31 (RASA1)      |
| 27  | RHOA   | mmu-miR-130b    | 12.79  | 63    | mmu-miR-130b (RHOA)     |
| 140 | SMC4   | mmu-miR-466g    | 6.47   | 19    | mmu-miR-466g (SMC4)     |
| 49  | STMN1  | mmu-miR-1894-5p | 3.04   | 5     | mmu-miR-1894-5p (STMN1) |
| 96  | STMN1  | mmu-miR-26a     | 46.56  | 239   | mmu-miR-26a (STMN1)     |
| 112 | TACC1  | mmu-miR-31      | 14.27  | 90    | mmu-miR-31 (TACC1)      |
| 195 | VIM    | mmu-miR-92a     | 139.50 | 139.5 | mmu-miR-92a (VIM)       |

Pathway ID      Adjusted P-value      Pathway Name  
1244      0.012987      REACTOME\_INNATE\_IMMUNE\_SYSTEM

| ASSAY ID | Entrez Gene ID | miRNA Name   | miRNApath Score | miRNApath Rank | miRNA - Gene          |
|----------|----------------|--------------|-----------------|----------------|-----------------------|
| 43       | APP            | mmu-miR-17   | 32.93           | 123            | mmu-miR-17 (APP)      |
| 75       | APP            | mmu-miR-20a  | 24.75           | 82             | mmu-miR-20a (APP)     |
| 58       | ATF2           | mmu-miR-1931 | 17.40           | 78             | mmu-miR-1931 (ATF2)   |
| 96       | ATF2           | mmu-miR-26a  | 28.79           | 138            | mmu-miR-26a (ATF2)    |
| 26       | ATG5           | mmu-miR-130a | 2.07            | 8              | mmu-miR-130a (ATG5)   |
| 44       | ATG5           | mmu-miR-181a | 26.41           | 102            | mmu-miR-181a (ATG5)   |
| 45       | ATG5           | mmu-miR-181b | 24.63           | 97             | mmu-miR-181b (ATG5)   |
| 140      | BCL2L1         | mmu-miR-466g | 8.37            | 37             | mmu-miR-466g (BCL2L1) |
| 174      | BTK            | mmu-miR-690  | 9.92            | 55.5           | mmu-miR-690 (BTK)     |
| 73       | C6             | mmu-miR-19b  | 129.00          | 129            | mmu-miR-19b (C6)      |
| 195      | C8A            | mmu-miR-92a  | 468.50          | 468.5          | mmu-miR-92a (C8A)     |
| 73       | C8B            | mmu-miR-19b  | 398.00          | 398            | mmu-miR-19b (C8B)     |



|     |        |               |        |       |                       |
|-----|--------|---------------|--------|-------|-----------------------|
| 12  | CAPZA2 | mmu-miR-103   | 542.00 | 542   | mmu-miR-103 (CAPZA2)  |
| 94  | CARD9  | mmu-miR-24    | 557.00 | 557   | mmu-miR-24 (CARD9)    |
| 12  | CASP1  | mmu-miR-103   | 429.50 | 429.5 | mmu-miR-103 (CASP1)   |
| 13  | CASP8  | mmu-miR-106a  | 9.36   | 35    | mmu-miR-106a (CASP8)  |
| 43  | CASP8  | mmu-miR-17    | 18.29  | 53    | mmu-miR-17 (CASP8)    |
| 75  | CASP8  | mmu-miR-20a   | 20.25  | 63    | mmu-miR-20a (CASP8)   |
| 44  | CD4    | mmu-miR-181a  | 78.24  | 346   | mmu-miR-181a (CD4)    |
| 45  | CD4    | mmu-miR-181b  | 61.50  | 290   | mmu-miR-181b (CD4)    |
| 12  | CFI    | mmu-miR-103   | 675.00 | 675   | mmu-miR-103 (CFI)     |
| 59  | CNPY3  | mmu-miR-1935  | 64.41  | 159   | mmu-miR-1935 (CNPY3)  |
| 43  | CREB1  | mmu-miR-17    | 8.77   | 9     | mmu-miR-17 (CREB1)    |
| 44  | CREB1  | mmu-miR-181a  | 32.87  | 134   | mmu-miR-181a (CREB1)  |
| 45  | CREB1  | mmu-miR-181b  | 50.29  | 237   | mmu-miR-181b (CREB1)  |
| 75  | CREB1  | mmu-miR-20a   | 14.64  | 35    | mmu-miR-20a (CREB1)   |
| 96  | CREB1  | mmu-miR-26a   | 35.79  | 188   | mmu-miR-26a (CREB1)   |
| 197 | CREB1  | mmu-miR-93    | 16.90  | 45    | mmu-miR-93 (CREB1)    |
| 195 | CTSS   | mmu-miR-92a   | 598.50 | 598.5 | mmu-miR-92a (CTSS)    |
| 16  | CYLD   | mmu-miR-107   | 1.59   | 3     | mmu-miR-107 (CYLD)    |
| 3   | DDOST  | mmu-let-7b    | 57.90  | 291   | mmu-let-7b (DDOST)    |
| 10  | DDOST  | mmu-let-7i    | 54.88  | 277   | mmu-let-7i (DDOST)    |
| 12  | DEFA1  | mmu-miR-103   | 242.00 | 242   | mmu-miR-103 (DEFA1)   |
| 12  | DEFA3  | mmu-miR-103   | 242.00 | 242   | mmu-miR-103 (DEFA3)   |
| 12  | DEFA6  | mmu-miR-103   | 242.00 | 242   | mmu-miR-103 (DEFA6)   |
| 12  | DHX58  | mmu-miR-103   | 502.50 | 502.5 | mmu-miR-103 (DHX58)   |
| 195 | DHX58  | mmu-miR-92a   | 691.50 | 691.5 | mmu-miR-92a (DHX58)   |
| 125 | DNM1   | mmu-miR-3473a | 524.00 | 524   | mmu-miR-3473a (DNM1)  |
| 182 | DNM1   | mmu-miR-709   | 41.28  | 232   | mmu-miR-709 (DNM1)    |
| 94  | DNM2   | mmu-miR-24    | 674.00 | 674   | mmu-miR-24 (DNM2)     |
| 197 | DNM2   | mmu-miR-93    | 70.06  | 332   | mmu-miR-93 (DNM2)     |
| 40  | DUSP3  | mmu-miR-15b   | 47.81  | 238   | mmu-miR-15b (DUSP3)   |
| 42  | DUSP3  | mmu-miR-16    | 43.62  | 217   | mmu-miR-16 (DUSP3)    |
| 125 | DUSP4  | mmu-miR-3473a | 462.00 | 462   | mmu-miR-3473a (DUSP4) |
| 27  | DUSP6  | mmu-miR-130b  | 11.58  | 59    | mmu-miR-130b (DUSP6)  |
| 112 | DUSP7  | mmu-miR-31    | 8.95   | 42    | mmu-miR-31 (DUSP7)    |
| 142 | DUSP7  | mmu-miR-466i  | 27.06  | 91    | mmu-miR-466i (DUSP7)  |
| 1   | EEA1   | mmu-let-7a    | 22.34  | 101   | mmu-let-7a (EEA1)     |
| 3   | EEA1   | mmu-let-7b    | 36.82  | 197   | mmu-let-7b (EEA1)     |
| 4   | EEA1   | mmu-let-7c    | 40.02  | 214   | mmu-let-7c (EEA1)     |
| 7   | EEA1   | mmu-let-7e    | 38.67  | 209   | mmu-let-7e (EEA1)     |
| 10  | EEA1   | mmu-let-7i    | 33.58  | 178   | mmu-let-7i (EEA1)     |
| 43  | EEA1   | mmu-miR-17    | 44.42  | 198   | mmu-miR-17 (EEA1)     |
| 75  | EEA1   | mmu-miR-20a   | 52.37  | 257   | mmu-miR-20a (EEA1)    |
| 197 | EEA1   | mmu-miR-93    | 62.48  | 300   | mmu-miR-93 (EEA1)     |

|     |          |                 |        |       |                           |
|-----|----------|-----------------|--------|-------|---------------------------|
| 46  | ELK1     | mmu-miR-1892    | 1.75   | 2     | mmu-miR-1892 (ELK1)       |
| 49  | ELK1     | mmu-miR-1894-5p | 6.54   | 18    | mmu-miR-1894-5p (ELK1)    |
| 30  | EP300    | mmu-miR-138*    | 232.00 | 232   | mmu-miR-138* (EP300)      |
| 165 | EP300    | mmu-miR-669e    | 3.73   | 14    | mmu-miR-669e (EP300)      |
| 44  | FOS      | mmu-miR-181a    | 28.65  | 113   | mmu-miR-181a (FOS)        |
| 46  | HMGB1    | mmu-miR-1892    | 5.04   | 21    | mmu-miR-1892 (HMGB1)      |
| 94  | HSP90AB1 | mmu-miR-24      | 144.00 | 144   | mmu-miR-24 (HSP90AB1)     |
| 44  | HSP90B1  | mmu-miR-181a    | 22.65  | 80    | mmu-miR-181a (HSP90B1)    |
| 45  | HSP90B1  | mmu-miR-181b    | 47.04  | 218   | mmu-miR-181b (HSP90B1)    |
| 137 | HSP90B1  | mmu-miR-466f-3p | 21.20  | 96    | mmu-miR-466f-3p (HSP90B1) |
| 148 | HSP90B1  | mmu-miR-467f    | 20.29  | 90    | mmu-miR-467f (HSP90B1)    |
| 195 | IFIH1    | mmu-miR-92a     | 464.00 | 464   | mmu-miR-92a (IFIH1)       |
| 195 | IFNA14   | mmu-miR-92a     | 332.00 | 332   | mmu-miR-92a (IFNA14)      |
| 1   | IKBKE    | mmu-let-7a      | 43.83  | 229   | mmu-let-7a (IKBKE)        |
| 3   | IKBKE    | mmu-let-7b      | 38.28  | 205   | mmu-let-7b (IKBKE)        |
| 4   | IKBKE    | mmu-let-7c      | 30.69  | 148   | mmu-let-7c (IKBKE)        |
| 6   | IKBKE    | mmu-let-7d      | 13.94  | 70    | mmu-let-7d (IKBKE)        |
| 7   | IKBKE    | mmu-let-7e      | 27.89  | 145   | mmu-let-7e (IKBKE)        |
| 10  | IKBKE    | mmu-let-7i      | 43.43  | 224   | mmu-let-7i (IKBKE)        |
| 12  | IKBKE    | mmu-miR-103     | 419.00 | 419   | mmu-miR-103 (IKBKE)       |
| 30  | IRAK1    | mmu-miR-138*    | 408.00 | 408   | mmu-miR-138* (IRAK1)      |
| 73  | IRAK3    | mmu-miR-19b     | 303.50 | 303.5 | mmu-miR-19b (IRAK3)       |
| 195 | IRAK4    | mmu-miR-92a     | 639.00 | 639   | mmu-miR-92a (IRAK4)       |
| 125 | IRF1     | mmu-miR-3473a   | 636.00 | 636   | mmu-miR-3473a (IRF1)      |
| 189 | IRF2     | mmu-miR-762     | 15.24  | 74    | mmu-miR-762 (IRF2)        |
| 75  | LBP      | mmu-miR-20a     | 23.08  | 76    | mmu-miR-20a (LBP)         |
| 40  | MAP2K1   | mmu-miR-15b     | 22.88  | 76    | mmu-miR-15b (MAP2K1)      |
| 42  | MAP2K1   | mmu-miR-16      | 50.16  | 262   | mmu-miR-16 (MAP2K1)       |
| 44  | MAP2K1   | mmu-miR-181a    | 48.03  | 222   | mmu-miR-181a (MAP2K1)     |
| 45  | MAP2K1   | mmu-miR-181b    | 87.59  | 389   | mmu-miR-181b (MAP2K1)     |
| 73  | MAP2K1   | mmu-miR-19b     | 583.00 | 583   | mmu-miR-19b (MAP2K1)      |
| 40  | MAP2K3   | mmu-miR-15b     | 122.00 | 508   | mmu-miR-15b (MAP2K3)      |
| 42  | MAP2K3   | mmu-miR-16      | 118.74 | 495   | mmu-miR-16 (MAP2K3)       |
| 140 | MAP2K4   | mmu-miR-466g    | 1.67   | 1     | mmu-miR-466g (MAP2K4)     |
| 106 | MAP2K6   | mmu-miR-3072*   | 2.57   | 9     | mmu-miR-3072* (MAP2K6)    |
| 1   | MAP3K1   | mmu-let-7a      | 22.34  | 102   | mmu-let-7a (MAP3K1)       |
| 3   | MAP3K1   | mmu-let-7b      | 19.78  | 78    | mmu-let-7b (MAP3K1)       |
| 4   | MAP3K1   | mmu-let-7c      | 21.95  | 91    | mmu-let-7c (MAP3K1)       |
| 7   | MAP3K1   | mmu-let-7e      | 20.24  | 81    | mmu-let-7e (MAP3K1)       |
| 10  | MAP3K1   | mmu-let-7i      | 24.13  | 109   | mmu-let-7i (MAP3K1)       |
| 96  | MAP3K1   | mmu-miR-26a     | 59.62  | 281   | mmu-miR-26a (MAP3K1)      |
| 112 | MAP3K1   | mmu-miR-31      | 15.30  | 100   | mmu-miR-31 (MAP3K1)       |
| 44  | MAPK1    | mmu-miR-181a    | 60.89  | 287   | mmu-miR-181a (MAPK1)      |

|     |          |                 |        |       |                          |
|-----|----------|-----------------|--------|-------|--------------------------|
| 45  | MAPK1    | mmu-miR-181b    | 66.76  | 315   | mmu-miR-181b (MAPK1)     |
| 140 | MAPK10   | mmu-miR-466g    | 4.43   | 8     | mmu-miR-466g (MAPK10)    |
| 30  | MAPK12   | mmu-miR-138*    | 126.00 | 126   | mmu-miR-138* (MAPK12)    |
| 171 | MAPK12   | mmu-miR-671-5p  | 17.81  | 87    | mmu-miR-671-5p (MAPK12)  |
| 49  | MAPK14   | mmu-miR-1894-5p | 1.91   | 3     | mmu-miR-1894-5p (MAPK14) |
| 30  | MAPK3    | mmu-miR-138*    | 470.00 | 470   | mmu-miR-138* (MAPK3)     |
| 41  | MAPK3    | mmu-miR-16*     | 279.50 | 279.5 | mmu-miR-16* (MAPK3)      |
| 12  | MAPK7    | mmu-miR-103     | 687.00 | 687   | mmu-miR-103 (MAPK7)      |
| 30  | MAPK7    | mmu-miR-138*    | 48.00  | 48    | mmu-miR-138* (MAPK7)     |
| 94  | MAPK7    | mmu-miR-24      | 344.50 | 344.5 | mmu-miR-24 (MAPK7)       |
| 195 | MAPK7    | mmu-miR-92a     | 453.00 | 453   | mmu-miR-92a (MAPK7)      |
| 1   | MAPK8    | mmu-let-7a      | 48.26  | 253   | mmu-let-7a (MAPK8)       |
| 3   | MAPK8    | mmu-let-7b      | 41.97  | 225   | mmu-let-7b (MAPK8)       |
| 4   | MAPK8    | mmu-let-7c      | 28.92  | 138   | mmu-let-7c (MAPK8)       |
| 7   | MAPK8    | mmu-let-7e      | 43.62  | 228   | mmu-let-7e (MAPK8)       |
| 10  | MAPK8    | mmu-let-7i      | 34.44  | 186   | mmu-let-7i (MAPK8)       |
| 12  | MAPK8    | mmu-miR-103     | 635.00 | 635   | mmu-miR-103 (MAPK8)      |
| 27  | MAPK8    | mmu-miR-130b    | 15.92  | 71    | mmu-miR-130b (MAPK8)     |
| 40  | MAPK8    | mmu-miR-15b     | 16.83  | 41    | mmu-miR-15b (MAPK8)      |
| 42  | MAPK8    | mmu-miR-16      | 15.16  | 38    | mmu-miR-16 (MAPK8)       |
| 68  | MAPK8    | mmu-miR-1949    | 8.17   | 41    | mmu-miR-1949 (MAPK8)     |
| 162 | MAPK8    | mmu-miR-669b    | 4.82   | 11    | mmu-miR-669b (MAPK8)     |
| 12  | MAPK9    | mmu-miR-103     | 348.50 | 348.5 | mmu-miR-103 (MAPK9)      |
| 43  | MAPK9    | mmu-miR-17      | 40.15  | 168   | mmu-miR-17 (MAPK9)       |
| 75  | MAPK9    | mmu-miR-20a     | 66.01  | 326   | mmu-miR-20a (MAPK9)      |
| 197 | MAPK9    | mmu-miR-93      | 27.83  | 100   | mmu-miR-93 (MAPK9)       |
| 94  | MAPKAPK2 | mmu-miR-24      | 145.00 | 145   | mmu-miR-24 (MAPKAPK2)    |
| 12  | MAPKAPK3 | mmu-miR-103     | 304.00 | 304   | mmu-miR-103 (MAPKAPK3)   |
| 1   | MASP1    | mmu-let-7a      | 34.45  | 175   | mmu-let-7a (MASP1)       |
| 3   | MASP1    | mmu-let-7b      | 31.72  | 158   | mmu-let-7b (MASP1)       |
| 4   | MASP1    | mmu-let-7c      | 31.24  | 154   | mmu-let-7c (MASP1)       |
| 6   | MASP1    | mmu-let-7d      | 11.30  | 56    | mmu-let-7d (MASP1)       |
| 7   | MASP1    | mmu-let-7e      | 35.96  | 191   | mmu-let-7e (MASP1)       |
| 10  | MASP1    | mmu-let-7i      | 34.70  | 187   | mmu-let-7i (MASP1)       |
| 73  | NFKBIA   | mmu-miR-19b     | 80.00  | 80    | mmu-miR-19b (NFKBIA)     |
| 40  | NLRX1    | mmu-miR-15b     | 63.04  | 334   | mmu-miR-15b (NLRX1)      |
| 42  | NLRX1    | mmu-miR-16      | 71.36  | 366   | mmu-miR-16 (NLRX1)       |
| 171 | NLRX1    | mmu-miR-671-5p  | 4.90   | 12    | mmu-miR-671-5p (NLRX1)   |
| 94  | OTUD5    | mmu-miR-24      | 348.50 | 348.5 | mmu-miR-24 (OTUD5)       |
| 115 | OTUD5    | mmu-miR-328     | 10.55  | 45    | mmu-miR-328 (OTUD5)      |
| 125 | P2RX7    | mmu-miR-3473a   | 353.00 | 353   | mmu-miR-3473a (P2RX7)    |
| 172 | PELI1    | mmu-miR-674     | 12.15  | 68    | mmu-miR-674 (PELI1)      |
| 12  | PELI2    | mmu-miR-103     | 551.00 | 551   | mmu-miR-103 (PELI2)      |

|     |         |                 |        |       |                              |
|-----|---------|-----------------|--------|-------|------------------------------|
| 40  | PELI2   | mmu-miR-15b     | 64.40  | 341   | mmu-miR-15b (PELI2)          |
| 42  | PELI2   | mmu-miR-16      | 60.43  | 317   | mmu-miR-16 (PELI2)           |
| 96  | PELI2   | mmu-miR-26a     | 34.33  | 178   | mmu-miR-26a (PELI2)          |
| 42  | PELI3   | mmu-miR-16      | 38.18  | 175   | mmu-miR-16 (PELI3)           |
| 12  | PIK3R4  | mmu-miR-103     | 314.50 | 314.5 | mmu-miR-103 (PIK3R4)         |
| 94  | PIK3R4  | mmu-miR-24      | 480.50 | 480.5 | mmu-miR-24 (PIK3R4)          |
| 40  | PPP2R1A | mmu-miR-15b     | 44.01  | 210   | mmu-miR-15b (PPP2R1A)        |
| 42  | PPP2R1A | mmu-miR-16      | 48.40  | 247   | mmu-miR-16 (PPP2R1A)         |
| 125 | PPP2R1B | mmu-miR-3473a   | 95.00  | 95    | mmu-miR-3473a (PPP2R1B)      |
| 94  | PYCARD  | mmu-miR-24      | 396.00 | 396   | mmu-miR-24 (PYCARD)          |
| 12  | RNF125  | mmu-miR-103     | 44.00  | 44    | mmu-miR-103 (RNF125)         |
| 41  | RNF125  | mmu-miR-16*     | 325.00 | 325   | mmu-miR-16* (RNF125)         |
| 24  | RPS6KA1 | mmu-miR-125b-5p | 35.79  | 204   | mmu-miR-125b-5p<br>(RPS6KA1) |
| 56  | RPS6KA1 | mmu-miR-191     | 2.79   | 19    | mmu-miR-191 (RPS6KA1)        |
| 189 | RPS6KA1 | mmu-miR-762     | 35.56  | 226   | mmu-miR-762 (RPS6KA1)        |
| 197 | RPS6KA1 | mmu-miR-93      | 80.19  | 369   | mmu-miR-93 (RPS6KA1)         |
| 43  | RPS6KA5 | mmu-miR-17      | 19.82  | 61    | mmu-miR-17 (RPS6KA5)         |
| 75  | RPS6KA5 | mmu-miR-20a     | 21.19  | 67    | mmu-miR-20a (RPS6KA5)        |
| 197 | RPS6KA5 | mmu-miR-93      | 29.11  | 115   | mmu-miR-93 (RPS6KA5)         |
| 94  | TAB1    | mmu-miR-24      | 664.00 | 664   | mmu-miR-24 (TAB1)            |
| 40  | TAB3    | mmu-miR-15b     | 59.30  | 309   | mmu-miR-15b (TAB3)           |
| 42  | TAB3    | mmu-miR-16      | 48.68  | 248   | mmu-miR-16 (TAB3)            |
| 44  | TAB3    | mmu-miR-181a    | 44.97  | 204   | mmu-miR-181a (TAB3)          |
| 45  | TAB3    | mmu-miR-181b    | 78.84  | 367   | mmu-miR-181b (TAB3)          |
| 96  | TAB3    | mmu-miR-26a     | 55.56  | 269   | mmu-miR-26a (TAB3)           |
| 137 | TANK    | mmu-miR-466f-3p | 26.56  | 128   | mmu-miR-466f-3p (TANK)       |
| 73  | TBK1    | mmu-miR-19b     | 625.00 | 625   | mmu-miR-19b (TBK1)           |
| 12  | TICAM1  | mmu-miR-103     | 408.00 | 408   | mmu-miR-103 (TICAM1)         |
| 30  | TICAM1  | mmu-miR-138*    | 173.00 | 173   | mmu-miR-138* (TICAM1)        |
| 195 | TICAM2  | mmu-miR-92a     | 352.00 | 352   | mmu-miR-92a (TICAM2)         |
| 41  | TLR2    | mmu-miR-16*     | 183.00 | 183   | mmu-miR-16* (TLR2)           |
| 40  | TRAF3   | mmu-miR-15b     | 10.60  | 15    | mmu-miR-15b (TRAF3)          |
| 42  | TRAF3   | mmu-miR-16      | 9.29   | 13    | mmu-miR-16 (TRAF3)           |
| 41  | TRAF3   | mmu-miR-16*     | 23.00  | 23    | mmu-miR-16* (TRAF3)          |
| 113 | TRAF3   | mmu-miR-320     | 0.87   | 1     | mmu-miR-320 (TRAF3)          |
| 125 | TRAF3   | mmu-miR-3473a   | 284.00 | 284   | mmu-miR-3473a (TRAF3)        |
| 13  | TXNIP   | mmu-miR-106a    | 11.15  | 43    | mmu-miR-106a (TXNIP)         |
| 43  | TXNIP   | mmu-miR-17      | 5.83   | 5     | mmu-miR-17 (TXNIP)           |
| 75  | TXNIP   | mmu-miR-20a     | 10.05  | 16    | mmu-miR-20a (TXNIP)          |
| 182 | TXNIP   | mmu-miR-709     | 9.04   | 23    | mmu-miR-709 (TXNIP)          |
| 197 | TXNIP   | mmu-miR-93      | 4.75   | 2     | mmu-miR-93 (TXNIP)           |
| 30  | UBA7    | mmu-miR-138*    | 69.50  | 69.5  | mmu-miR-138* (UBA7)          |

|     |        |              |        |       |                       |
|-----|--------|--------------|--------|-------|-----------------------|
| 94  | UBA7   | mmu-miR-24   | 133.50 | 133.5 | mmu-miR-24 (UBA7)     |
| 96  | UBE2D1 | mmu-miR-26a  | 53.30  | 263   | mmu-miR-26a (UBE2D1)  |
| 162 | UBE2D1 | mmu-miR-669b | 21.61  | 120   | mmu-miR-669b (UBE2D1) |
| 174 | UBE2D1 | mmu-miR-690  | 11.40  | 66    | mmu-miR-690 (UBE2D1)  |
| 112 | UBE2K  | mmu-miR-31   | 10.38  | 51    | mmu-miR-31 (UBE2K)    |
| 44  | UBE2N  | mmu-miR-181a | 24.82  | 96    | mmu-miR-181a (UBE2N)  |
| 45  | UBE2N  | mmu-miR-181b | 35.38  | 151   | mmu-miR-181b (UBE2N)  |
| 41  | ZBP1   | mmu-miR-16*  | 264.00 | 264   | mmu-miR-16* (ZBP1)    |

Pathway ID      Adjusted P-value      Pathway Name  
6              0.013986      KEGG\_GALACTOSE\_METABOLISM

| ASSAY ID | Entrez Gene ID | miRNA Name    | miRNApath Score | miRNApath Rank | miRNA - Gene            |
|----------|----------------|---------------|-----------------|----------------|-------------------------|
| 40       | B4GALT1        | mmu-miR-15b   | 82.34           | 414            | mmu-miR-15b (B4GALT1)   |
| 42       | B4GALT1        | mmu-miR-16    | 75.79           | 382            | mmu-miR-16 (B4GALT1)    |
| 44       | B4GALT1        | mmu-miR-181a  | 68.81           | 312            | mmu-miR-181a (B4GALT1)  |
| 45       | B4GALT1        | mmu-miR-181b  | 65.16           | 306            | mmu-miR-181b (B4GALT1)  |
| 59       | B4GALT1        | mmu-miR-1935  | 45.55           | 113            | mmu-miR-1935 (B4GALT1)  |
| 106      | B4GALT2        | mmu-miR-3072* | 1.04            | 1              | mmu-miR-3072* (B4GALT2) |
| 189      | B4GALT2        | mmu-miR-762   | 6.21            | 11             | mmu-miR-762 (B4GALT2)   |
| 30       | G6PC           | mmu-miR-138*  | 215.00          | 215            | mmu-miR-138* (G6PC)     |
| 125      | G6PC           | mmu-miR-3473a | 270.00          | 270            | mmu-miR-3473a (G6PC)    |
| 1        | GALE           | mmu-let-7a    | 26.69           | 132            | mmu-let-7a (GALE)       |
| 3        | GALE           | mmu-let-7b    | 40.81           | 219            | mmu-let-7b (GALE)       |
| 4        | GALE           | mmu-let-7c    | 32.56           | 168            | mmu-let-7c (GALE)       |
| 7        | GALE           | mmu-let-7e    | 14.24           | 50             | mmu-let-7e (GALE)       |
| 10       | GALE           | mmu-let-7i    | 47.30           | 254            | mmu-let-7i (GALE)       |
| 30       | GALK1          | mmu-miR-138*  | 331.50          | 331.5          | mmu-miR-138* (GALK1)    |
| 30       | GALT           | mmu-miR-138*  | 27.00           | 27             | mmu-miR-138* (GALT)     |
| 195      | GLA            | mmu-miR-92a   | 300.00          | 300            | mmu-miR-92a (GLA)       |
| 94       | GLB1           | mmu-miR-24    | 15.00           | 15             | mmu-miR-24 (GLB1)       |
| 94       | LALBA          | mmu-miR-24    | 564.00          | 564            | mmu-miR-24 (LALBA)      |
| 40       | PFKL           | mmu-miR-15b   | 32.00           | 133            | mmu-miR-15b (PFKL)      |
| 42       | PFKL           | mmu-miR-16    | 29.44           | 118            | mmu-miR-16 (PFKL)       |
| 94       | PFKL           | mmu-miR-24    | 282.00          | 282            | mmu-miR-24 (PFKL)       |
| 75       | PFKP           | mmu-miR-20a   | 51.28           | 248            | mmu-miR-20a (PFKP)      |
| 125      | PFKP           | mmu-miR-3473a | 518.00          | 518            | mmu-miR-3473a (PFKP)    |
| 41       | PGM1           | mmu-miR-16*   | 334.00          | 334            | mmu-miR-16* (PGM1)      |
| 40       | PGM2           | mmu-miR-15b   | 65.15           | 344            | mmu-miR-15b (PGM2)      |
| 42       | PGM2           | mmu-miR-16    | 28.69           | 115            | mmu-miR-16 (PGM2)       |
| 195      | UGP2           | mmu-miR-92a   | 322.00          | 322            | mmu-miR-92a (UGP2)      |

| Pathway ID | Adjusted P-value | Pathway Name       |                 |                |                     |
|------------|------------------|--------------------|-----------------|----------------|---------------------|
| 719        | 0.013986         | REACTOME_DEFENSINS |                 |                |                     |
| ASSAY ID   | Entrez Gene ID   | miRNA Name         | miRNApath Score | miRNApath Rank | miRNA - Gene        |
| 44         | CD4              | mmu-miR-181a       | 78.24           | 346            | mmu-miR-181a (CD4)  |
| 45         | CD4              | mmu-miR-181b       | 61.50           | 290            | mmu-miR-181b (CD4)  |
| 12         | DEFA1            | mmu-miR-103        | 242.00          | 242            | mmu-miR-103 (DEFA1) |
| 12         | DEFA3            | mmu-miR-103        | 242.00          | 242            | mmu-miR-103 (DEFA3) |
| 12         | DEFA6            | mmu-miR-103        | 242.00          | 242            | mmu-miR-103 (DEFA6) |
| 41         | TLR2             | mmu-miR-16*        | 183.00          | 183            | mmu-miR-16* (TLR2)  |

| Pathway ID | Adjusted P-value | Pathway Name                              |                 |                |                       |
|------------|------------------|-------------------------------------------|-----------------|----------------|-----------------------|
| 792        | 0.013986         | REACTOME_THE_ACTIVATION_OF_ARYLSULFATASES |                 |                |                       |
| ASSAY ID   | Entrez Gene ID   | miRNA Name                                | miRNApath Score | miRNApath Rank | miRNA - Gene          |
| 94         | ARSI             | mmu-miR-24                                | 342.00          | 342            | mmu-miR-24 (ARSI)     |
| 44         | ARSJ             | mmu-miR-181a                              | 41.17           | 182            | mmu-miR-181a (ARSJ)   |
| 45         | ARSJ             | mmu-miR-181b                              | 20.62           | 73             | mmu-miR-181b (ARSJ)   |
| 43         | SUMF1            | mmu-miR-17                                | 66.07           | 327            | mmu-miR-17 (SUMF1)    |
| 59         | SUMF1            | mmu-miR-1935                              | 76.55           | 174            | mmu-miR-1935 (SUMF1)  |
| 75         | SUMF1            | mmu-miR-20a                               | 87.00           | 408            | mmu-miR-20a (SUMF1)   |
| 197        | SUMF1            | mmu-miR-93                                | 57.78           | 271            | mmu-miR-93 (SUMF1)    |
| 125        | SUMF2            | mmu-miR-3473a                             | 234.00          | 234            | mmu-miR-3473a (SUMF2) |

| Pathway ID | Adjusted P-value | Pathway Name                                                  |
|------------|------------------|---------------------------------------------------------------|
| 1173       | 0.013986         | REACTOME_ACTIVATION_OF_IRF3_IRF7_MEDIATED_BY_TBK1_IKK_EPSILON |

| ASSAY ID | Entrez Gene ID | miRNA Name    | miRNApath Score | miRNApath Rank | miRNA - Gene          |
|----------|----------------|---------------|-----------------|----------------|-----------------------|
| 1        | IKBKE          | mmu-let-7a    | 43.83           | 229            | mmu-let-7a (IKBKE)    |
| 3        | IKBKE          | mmu-let-7b    | 38.28           | 205            | mmu-let-7b (IKBKE)    |
| 4        | IKBKE          | mmu-let-7c    | 30.69           | 148            | mmu-let-7c (IKBKE)    |
| 6        | IKBKE          | mmu-let-7d    | 13.94           | 70             | mmu-let-7d (IKBKE)    |
| 7        | IKBKE          | mmu-let-7e    | 27.89           | 145            | mmu-let-7e (IKBKE)    |
| 10       | IKBKE          | mmu-let-7i    | 43.43           | 224            | mmu-let-7i (IKBKE)    |
| 12       | IKBKE          | mmu-miR-103   | 419.00          | 419            | mmu-miR-103 (IKBKE)   |
| 73       | TBK1           | mmu-miR-19b   | 625.00          | 625            | mmu-miR-19b (TBK1)    |
| 12       | TICAM1         | mmu-miR-103   | 408.00          | 408            | mmu-miR-103 (TICAM1)  |
| 30       | TICAM1         | mmu-miR-138*  | 173.00          | 173            | mmu-miR-138* (TICAM1) |
| 195      | TICAM2         | mmu-miR-92a   | 352.00          | 352            | mmu-miR-92a (TICAM2)  |
| 40       | TRAF3          | mmu-miR-15b   | 10.60           | 15             | mmu-miR-15b (TRAF3)   |
| 42       | TRAF3          | mmu-miR-16    | 9.29            | 13             | mmu-miR-16 (TRAF3)    |
| 41       | TRAF3          | mmu-miR-16*   | 23.00           | 23             | mmu-miR-16* (TRAF3)   |
| 113      | TRAF3          | mmu-miR-320   | 0.87            | 1              | mmu-miR-320 (TRAF3)   |
| 125      | TRAF3          | mmu-miR-3473a | 284.00          | 284            | mmu-miR-3473a (TRAF3) |

| Pathway ID | Adjusted P-value | Pathway Name         |
|------------|------------------|----------------------|
| 281        | 0.015984         | BIOCARTA_IL5_PATHWAY |

| ASSAY ID | Entrez Gene ID | miRNA Name   | miRNApath Score | miRNApath Rank | miRNA - Gene        |
|----------|----------------|--------------|-----------------|----------------|---------------------|
| 73       | CCL11          | mmu-miR-19b  | 137.00          | 137            | mmu-miR-19b (CCL11) |
| 44       | CD4            | mmu-miR-181a | 78.24           | 346            | mmu-miR-181a (CD4)  |
| 45       | CD4            | mmu-miR-181b | 61.50           | 290            | mmu-miR-181b (CD4)  |
| 94       | IL4            | mmu-miR-24   | 193.50          | 193.5          | mmu-miR-24 (IL4)    |
| 1        | IL6            | mmu-let-7a   | 19.58           | 74             | mmu-let-7a (IL6)    |
| 3        | IL6            | mmu-let-7b   | 28.65           | 141            | mmu-let-7b (IL6)    |
| 4        | IL6            | mmu-let-7c   | 22.49           | 96             | mmu-let-7c (IL6)    |
| 7        | IL6            | mmu-let-7e   | 19.62           | 78             | mmu-let-7e (IL6)    |
| 10       | IL6            | mmu-let-7i   | 20.96           | 84             | mmu-let-7i (IL6)    |
| 44       | IL6            | mmu-miR-181a | 11.79           | 30             | mmu-miR-181a (IL6)  |
| 45       | IL6            | mmu-miR-181b | 11.04           | 22             | mmu-miR-181b (IL6)  |

| Pathway ID | Adjusted P-value | Pathway Name                                                              |                 |                |                      |
|------------|------------------|---------------------------------------------------------------------------|-----------------|----------------|----------------------|
| 428        | 0.015984         | ST_STAT3_PATHWAY                                                          |                 |                |                      |
| ASSAY ID   | Entrez Gene ID   | miRNA Name                                                                | miRNApath Score | miRNApath Rank | miRNA - Gene         |
| 1          | IL6              | mmu-let-7a                                                                | 19.58           | 74             | mmu-let-7a (IL6)     |
| 3          | IL6              | mmu-let-7b                                                                | 28.65           | 141            | mmu-let-7b (IL6)     |
| 4          | IL6              | mmu-let-7c                                                                | 22.49           | 96             | mmu-let-7c (IL6)     |
| 7          | IL6              | mmu-let-7e                                                                | 19.62           | 78             | mmu-let-7e (IL6)     |
| 10         | IL6              | mmu-let-7i                                                                | 20.96           | 84             | mmu-let-7i (IL6)     |
| 44         | IL6              | mmu-miR-181a                                                              | 11.79           | 30             | mmu-miR-181a (IL6)   |
| 45         | IL6              | mmu-miR-181b                                                              | 11.04           | 22             | mmu-miR-181b (IL6)   |
| 13         | JAK1             | mmu-miR-106a                                                              | 14.51           | 57             | mmu-miR-106a (JAK1)  |
| 43         | JAK1             | mmu-miR-17                                                                | 42.24           | 185            | mmu-miR-17 (JAK1)    |
| 75         | JAK1             | mmu-miR-20a                                                               | 34.05           | 133            | mmu-miR-20a (JAK1)   |
| 125        | JAK1             | mmu-miR-3473a                                                             | 645.00          | 645            | mmu-miR-3473a (JAK1) |
| 44         | PIAS3            | mmu-miR-181a                                                              | 50.32           | 236            | mmu-miR-181a (PIAS3) |
| 45         | PIAS3            | mmu-miR-181b                                                              | 42.16           | 189            | mmu-miR-181b (PIAS3) |
| 1          | PTPRU            | mmu-let-7a                                                                | 42.57           | 219            | mmu-let-7a (PTPRU)   |
| 73         | PTPRU            | mmu-miR-19b                                                               | 665.00          | 665            | mmu-miR-19b (PTPRU)  |
| 43         | STAT3            | mmu-miR-17                                                                | 49.66           | 233            | mmu-miR-17 (STAT3)   |
| 75         | STAT3            | mmu-miR-20a                                                               | 53.60           | 265            | mmu-miR-20a (STAT3)  |
| 174        | STAT3            | mmu-miR-690                                                               | 8.28            | 45             | mmu-miR-690 (STAT3)  |
| 197        | STAT3            | mmu-miR-93                                                                | 45.91           | 212            | mmu-miR-93 (STAT3)   |
| Pathway ID | Adjusted P-value | Pathway Name                                                              |                 |                |                      |
| 1089       | 0.017982         | REACTOME_SYNTHESIS_AND_INTERCONVERSION_OF_NUCLEOTIDE_DI_AND_TRIPHOSPHATES |                 |                |                      |
| ASSAY ID   | Entrez Gene ID   | miRNA Name                                                                | miRNApath Score | miRNApath Rank | miRNA - Gene         |
| 58         | CTPS             | mmu-miR-1931                                                              | 8.05            | 39             | mmu-miR-1931 (CTPS)  |
| 140        | CTPS             | mmu-miR-466g                                                              | 22.81           | 101            | mmu-miR-466g (CTPS)  |
| 195        | DTYMK            | mmu-miR-92a                                                               | 559.50          | 559.5          | mmu-miR-92a (DTYMK)  |
| 1          | NME4             | mmu-let-7a                                                                | 12.52           | 35             | mmu-let-7a (NME4)    |
| 3          | NME4             | mmu-let-7b                                                                | 13.14           | 32             | mmu-let-7b (NME4)    |
| 4          | NME4             | mmu-let-7c                                                                | 13.01           | 37             | mmu-let-7c (NME4)    |
| 6          | NME4             | mmu-let-7d                                                                | 3.68            | 6              | mmu-let-7d (NME4)    |
| 7          | NME4             | mmu-let-7e                                                                | 13.23           | 39             | mmu-let-7e (NME4)    |
| 10         | NME4             | mmu-let-7i                                                                | 13.02           | 35             | mmu-let-7i (NME4)    |
| 41         | NME4             | mmu-miR-16*                                                               | 293.00          | 293            | mmu-miR-16* (NME4)   |
| 189        | NME4             | mmu-miR-762                                                               | 4.45            | 4              | mmu-miR-762 (NME4)   |
| 1          | RRM2             | mmu-let-7a                                                                | 70.21           | 308            | mmu-let-7a (RRM2)    |
| 3          | RRM2             | mmu-let-7b                                                                | 70.15           | 313            | mmu-let-7b (RRM2)    |



|     |        |                 |        |     |                          |
|-----|--------|-----------------|--------|-----|--------------------------|
| 4   | RRM2   | mmu-let-7c      | 71.61  | 323 | mmu-let-7c (RRM2)        |
| 7   | RRM2   | mmu-let-7e      | 62.88  | 289 | mmu-let-7e (RRM2)        |
| 10  | RRM2   | mmu-let-7i      | 41.52  | 217 | mmu-let-7i (RRM2)        |
| 13  | RRM2   | mmu-miR-106a    | 25.89  | 108 | mmu-miR-106a (RRM2)      |
| 75  | RRM2   | mmu-miR-20a     | 118.61 | 456 | mmu-miR-20a (RRM2)       |
| 197 | RRM2   | mmu-miR-93      | 79.13  | 362 | mmu-miR-93 (RRM2)        |
| 24  | TXNRD1 | mmu-miR-125b-5p | 85.04  | 311 | mmu-miR-125b-5p (TXNRD1) |

|            |                  |                           |
|------------|------------------|---------------------------|
| Pathway ID | Adjusted P-value | Pathway Name              |
| 9          | 0.01998          | KEGG_STEROID_BIOSYNTHESIS |

| ASSAY ID | Entrez Gene ID | miRNA Name    | miRNApath Score | miRNApath Rank | miRNA - Gene          |
|----------|----------------|---------------|-----------------|----------------|-----------------------|
| 103      | CEL            | mmu-miR-297a  | 3.02            | 8              | mmu-miR-297a (CEL)    |
| 40       | HSD17B7        | mmu-miR-15b   | 49.15           | 244            | mmu-miR-15b (HSD17B7) |
| 42       | HSD17B7        | mmu-miR-16    | 50.47           | 264            | mmu-miR-16 (HSD17B7)  |
| 125      | NSDHL          | mmu-miR-3473a | 355.00          | 355            | mmu-miR-3473a (NSDHL) |
| 1        | SOAT2          | mmu-let-7a    | 12.46           | 33             | mmu-let-7a (SOAT2)    |
| 3        | SOAT2          | mmu-let-7b    | 9.06            | 19             | mmu-let-7b (SOAT2)    |
| 4        | SOAT2          | mmu-let-7c    | 8.90            | 15             | mmu-let-7c (SOAT2)    |
| 6        | SOAT2          | mmu-let-7d    | 7.14            | 28             | mmu-let-7d (SOAT2)    |
| 7        | SOAT2          | mmu-let-7e    | 12.51           | 35             | mmu-let-7e (SOAT2)    |
| 10       | SOAT2          | mmu-let-7i    | 13.21           | 36             | mmu-let-7i (SOAT2)    |
| 195      | SQLE           | mmu-miR-92a   | 489.00          | 489            | mmu-miR-92a (SQLE)    |

|            |                  |                            |
|------------|------------------|----------------------------|
| Pathway ID | Adjusted P-value | Pathway Name               |
| 56         | 0.01998          | KEGG_RIBOFLAVIN_METABOLISM |

| ASSAY ID | Entrez Gene ID | miRNA Name  | miRNApath Score | miRNApath Rank | miRNA - Gene        |
|----------|----------------|-------------|-----------------|----------------|---------------------|
| 182      | ACP2           | mmu-miR-709 | 41.48           | 236            | mmu-miR-709 (ACP2)  |
| 189      | ACP2           | mmu-miR-762 | 30.57           | 190            | mmu-miR-762 (ACP2)  |
| 73       | ENPP1          | mmu-miR-19b | 608.00          | 608            | mmu-miR-19b (ENPP1) |
| 94       | ENPP3          | mmu-miR-24  | 311.00          | 311            | mmu-miR-24 (ENPP3)  |
| 195      | MTMR7          | mmu-miR-92a | 128.00          | 128            | mmu-miR-92a (MTMR7) |

| Pathway ID | Adjusted P-value | Pathway Name                                |                 |                |                       |
|------------|------------------|---------------------------------------------|-----------------|----------------|-----------------------|
| 658        | 0.01998          | REACTOME_PROCESSING_OF_INTRONLESS_PRE_MRNAS |                 |                |                       |
| ASSAY ID   | Entrez Gene ID   | miRNA Name                                  | miRNApath Score | miRNApath Rank | miRNA - Gene          |
| 1          | CLP1             | mmu-let-7a                                  | 32.64           | 165            | mmu-let-7a (CLP1)     |
| 3          | CLP1             | mmu-let-7b                                  | 28.36           | 140            | mmu-let-7b (CLP1)     |
| 4          | CLP1             | mmu-let-7c                                  | 33.67           | 178            | mmu-let-7c (CLP1)     |
| 6          | CLP1             | mmu-let-7d                                  | 6.84            | 24             | mmu-let-7d (CLP1)     |
| 7          | CLP1             | mmu-let-7e                                  | 38.05           | 202            | mmu-let-7e (CLP1)     |
| 10         | CLP1             | mmu-let-7i                                  | 14.13           | 40             | mmu-let-7i (CLP1)     |
| 30         | CLP1             | mmu-miR-138*                                | 144.00          | 144            | mmu-miR-138* (CLP1)   |
| 12         | CPSF1            | mmu-miR-103                                 | 30.00           | 30             | mmu-miR-103 (CPSF1)   |
| 96         | CPSF2            | mmu-miR-26a                                 | 46.95           | 241            | mmu-miR-26a (CPSF2)   |
| 103        | CPSF2            | mmu-miR-297a                                | 6.03            | 32             | mmu-miR-297a (CPSF2)  |
| 40         | CPSF7            | mmu-miR-15b                                 | 43.96           | 209            | mmu-miR-15b (CPSF7)   |
| 42         | CPSF7            | mmu-miR-16                                  | 41.93           | 203            | mmu-miR-16 (CPSF7)    |
| 59         | CPSF7            | mmu-miR-1935                                | 30.20           | 65             | mmu-miR-1935 (CPSF7)  |
| 172        | CPSF7            | mmu-miR-674                                 | 10.01           | 51             | mmu-miR-674 (CPSF7)   |
| 189        | CPSF7            | mmu-miR-762                                 | 22.65           | 135            | mmu-miR-762 (CPSF7)   |
| 30         | NCBP1            | mmu-miR-138*                                | 17.00           | 17             | mmu-miR-138* (NCBP1)  |
| 44         | NCBP1            | mmu-miR-181a                                | 7.02            | 11             | mmu-miR-181a (NCBP1)  |
| 45         | NCBP1            | mmu-miR-181b                                | 20.95           | 77             | mmu-miR-181b (NCBP1)  |
| 174        | NCBP1            | mmu-miR-690                                 | 9.92            | 55.5           | mmu-miR-690 (NCBP1)   |
| 13         | PAPOLA           | mmu-miR-106a                                | 17.50           | 75             | mmu-miR-106a (PAPOLA) |
| 43         | PAPOLA           | mmu-miR-17                                  | 81.96           | 376            | mmu-miR-17 (PAPOLA)   |
| 75         | PAPOLA           | mmu-miR-20a                                 | 39.39           | 164            | mmu-miR-20a (PAPOLA)  |
| 103        | PAPOLA           | mmu-miR-297a                                | 8.70            | 37             | mmu-miR-297a (PAPOLA) |
| 197        | PAPOLA           | mmu-miR-93                                  | 59.27           | 282            | mmu-miR-93 (PAPOLA)   |
| 141        | PCF11            | mmu-miR-466h                                | 5.65            | 13             | mmu-miR-466h (PCF11)  |
| 143        | PCF11            | mmu-miR-466j                                | 4.09            | 12             | mmu-miR-466j (PCF11)  |

| Pathway ID | Adjusted P-value | Pathway Name                               |                 |                |                         |
|------------|------------------|--------------------------------------------|-----------------|----------------|-------------------------|
| 817        | 0.01998          | REACTOME_MHC_CLASS_II_ANTIGEN_PRESENTATION |                 |                |                         |
| ASSAY ID   | Entrez Gene ID   | miRNA Name                                 | miRNApath Score | miRNApath Rank | miRNA - Gene            |
| 12         | ACTR1B           | mmu-miR-103                                | 645.00          | 645            | mmu-miR-103 (ACTR1B)    |
| 18         | AP1G1            | mmu-miR-1187                               | 5.82            | 17             | mmu-miR-1187 (AP1G1)    |
| 56         | AP1G1            | mmu-miR-191                                | 2.81            | 20             | mmu-miR-191 (AP1G1)     |
| 180        | AP1G1            | mmu-miR-705                                | 4.49            | 4              | mmu-miR-705 (AP1G1)     |
| 12         | AP1M1            | mmu-miR-103                                | 564.00          | 564            | mmu-miR-103 (AP1M1)     |
| 157        | AP1M1            | mmu-miR-574-5p                             | 10.72           | 55             | mmu-miR-574-5p (AP1M1)  |
| 189        | AP1M1            | mmu-miR-762                                | 32.10           | 200            | mmu-miR-762 (AP1M1)     |
| 94         | AP1M2            | mmu-miR-24                                 | 62.00           | 62             | mmu-miR-24 (AP1M2)      |
| 171        | AP1M2            | mmu-miR-671-5p                             | 12.09           | 51             | mmu-miR-671-5p (AP1M2)  |
| 1          | AP1S1            | mmu-let-7a                                 | 18.75           | 70             | mmu-let-7a (AP1S1)      |
| 3          | AP1S1            | mmu-let-7b                                 | 17.25           | 62             | mmu-let-7b (AP1S1)      |
| 4          | AP1S1            | mmu-let-7c                                 | 18.42           | 66             | mmu-let-7c (AP1S1)      |
| 6          | AP1S1            | mmu-let-7d                                 | 5.63            | 18             | mmu-let-7d (AP1S1)      |
| 7          | AP1S1            | mmu-let-7e                                 | 16.74           | 58             | mmu-let-7e (AP1S1)      |
| 10         | AP1S1            | mmu-let-7i                                 | 19.58           | 73             | mmu-let-7i (AP1S1)      |
| 59         | AP1S1            | mmu-miR-1935                               | 33.57           | 77             | mmu-miR-1935 (AP1S1)    |
| 12         | AP1S2            | mmu-miR-103                                | 702.00          | 702            | mmu-miR-103 (AP1S2)     |
| 12         | AP2A1            | mmu-miR-103                                | 639.00          | 639            | mmu-miR-103 (AP2A1)     |
| 73         | AP2M1            | mmu-miR-19b                                | 547.00          | 547            | mmu-miR-19b (AP2M1)     |
| 180        | AP2M1            | mmu-miR-705                                | 22.58           | 134            | mmu-miR-705 (AP2M1)     |
| 182        | AP2S1            | mmu-miR-709                                | 38.55           | 220            | mmu-miR-709 (AP2S1)     |
| 172        | CLTA             | mmu-miR-674                                | 6.45            | 25             | mmu-miR-674 (CLTA)      |
| 157        | CTSD             | mmu-miR-574-5p                             | 2.84            | 3              | mmu-miR-574-5p (CTSD)   |
| 137        | CTSH             | mmu-miR-466f-3p                            | 25.76           | 125            | mmu-miR-466f-3p (CTSH)  |
| 195        | CTSS             | mmu-miR-92a                                | 598.50          | 598.5          | mmu-miR-92a (CTSS)      |
| 24         | DCTN1            | mmu-miR-125b-5p                            | 32.16           | 171            | mmu-miR-125b-5p (DCTN1) |
| 12         | DCTN2            | mmu-miR-103                                | 541.00          | 541            | mmu-miR-103 (DCTN2)     |
| 41         | DCTN2            | mmu-miR-16*                                | 457.00          | 457            | mmu-miR-16* (DCTN2)     |
| 30         | DCTN5            | mmu-miR-138*                               | 272.00          | 272            | mmu-miR-138* (DCTN5)    |
| 195        | DCTN5            | mmu-miR-92a                                | 652.00          | 652            | mmu-miR-92a (DCTN5)     |
| 125        | DNM1             | mmu-miR-3473a                              | 524.00          | 524            | mmu-miR-3473a (DNM1)    |
| 182        | DNM1             | mmu-miR-709                                | 41.28           | 232            | mmu-miR-709 (DNM1)      |
| 94         | DNM2             | mmu-miR-24                                 | 674.00          | 674            | mmu-miR-24 (DNM2)       |
| 197        | DNM2             | mmu-miR-93                                 | 70.06           | 332            | mmu-miR-93 (DNM2)       |
| 12         | DYNC1H1          | mmu-miR-103                                | 675.00          | 675            | mmu-miR-103 (DYNC1H1)   |
| 40         | DYNC1I1          | mmu-miR-15b                                | 60.56           | 317            | mmu-miR-15b (DYNC1I1)   |
| 42         | DYNC1I1          | mmu-miR-16                                 | 49.03           | 256            | mmu-miR-16 (DYNC1I1)    |
| 30         | DYNC1I2          | mmu-miR-138*                               | 115.00          | 115            | mmu-miR-138* (DYNC1I2)  |

|     |          |                 |        |     |                               |
|-----|----------|-----------------|--------|-----|-------------------------------|
| 148 | DYNC1I2  | mmu-miR-467f    | 41.02  | 178 | mmu-miR-467f (DYNC1I2)        |
| 174 | DYNC1I2  | mmu-miR-690     | 10.42  | 60  | mmu-miR-690 (DYNC1I2)         |
| 40  | DYNC1LI2 | mmu-miR-15b     | 59.04  | 307 | mmu-miR-15b (DYNC1LI2)        |
| 42  | DYNC1LI2 | mmu-miR-16      | 51.71  | 278 | mmu-miR-16 (DYNC1LI2)         |
| 44  | DYNC1LI2 | mmu-miR-181a    | 55.45  | 263 | mmu-miR-181a (DYNC1LI2)       |
| 45  | DYNC1LI2 | mmu-miR-181b    | 74.61  | 348 | mmu-miR-181b (DYNC1LI2)       |
| 49  | DYNC1LI2 | mmu-miR-1894-5p | 6.75   | 21  | mmu-miR-1894-5p<br>(DYNC1LI2) |
| 75  | DYNC1LI2 | mmu-miR-20a     | 71.26  | 353 | mmu-miR-20a (DYNC1LI2)        |
| 197 | DYNC1LI2 | mmu-miR-93      | 87.87  | 401 | mmu-miR-93 (DYNC1LI2)         |
| 73  | DYNC2H1  | mmu-miR-19b     | 383.00 | 383 | mmu-miR-19b (DYNC2H1)         |
| 195 | DYNC2H1  | mmu-miR-92a     | 240.00 | 240 | mmu-miR-92a (DYNC2H1)         |
| 44  | DYNLL2   | mmu-miR-181a    | 31.18  | 127 | mmu-miR-181a (DYNLL2)         |
| 45  | DYNLL2   | mmu-miR-181b    | 28.29  | 115 | mmu-miR-181b (DYNLL2)         |
| 125 | DYNLL2   | mmu-miR-3473a   | 54.00  | 54  | mmu-miR-3473a (DYNLL2)        |
| 136 | KIF15    | mmu-miR-466c-5p | 1.81   | 6   | mmu-miR-466c-5p (KIF15)       |
| 41  | KIF18A   | mmu-miR-16*     | 313.00 | 313 | mmu-miR-16* (KIF18A)          |
| 40  | KIF23    | mmu-miR-15b     | 34.66  | 154 | mmu-miR-15b (KIF23)           |
| 42  | KIF23    | mmu-miR-16      | 33.26  | 142 | mmu-miR-16 (KIF23)            |
| 43  | KIF23    | mmu-miR-17      | 41.38  | 182 | mmu-miR-17 (KIF23)            |
| 75  | KIF23    | mmu-miR-20a     | 36.66  | 150 | mmu-miR-20a (KIF23)           |
| 197 | KIF23    | mmu-miR-93      | 49.65  | 229 | mmu-miR-93 (KIF23)            |
| 41  | KIF2A    | mmu-miR-16*     | 17.00  | 17  | mmu-miR-16* (KIF2A)           |
| 6   | KIF2B    | mmu-let-7d      | 7.51   | 35  | mmu-let-7d (KIF2B)            |
| 10  | KIF2B    | mmu-let-7i      | 14.99  | 45  | mmu-let-7i (KIF2B)            |
| 44  | KIF3B    | mmu-miR-181a    | 36.88  | 157 | mmu-miR-181a (KIF3B)          |
| 45  | KIF3B    | mmu-miR-181b    | 46.32  | 213 | mmu-miR-181b (KIF3B)          |
| 59  | KIF3B    | mmu-miR-1935    | 7.42   | 6   | mmu-miR-1935 (KIF3B)          |
| 182 | KIF3B    | mmu-miR-709     | 16.34  | 87  | mmu-miR-709 (KIF3B)           |
| 189 | KIF3C    | mmu-miR-762     | 11.15  | 42  | mmu-miR-762 (KIF3C)           |
| 43  | KIF5A    | mmu-miR-17      | 19.33  | 58  | mmu-miR-17 (KIF5A)            |
| 75  | KIF5A    | mmu-miR-20a     | 19.30  | 60  | mmu-miR-20a (KIF5A)           |
| 197 | KIF5A    | mmu-miR-93      | 18.65  | 54  | mmu-miR-93 (KIF5A)            |
| 24  | KLC2     | mmu-miR-125b-5p | 41.25  | 232 | mmu-miR-125b-5p (KLC2)        |
| 180 | KLC2     | mmu-miR-705     | 13.93  | 96  | mmu-miR-705 (KLC2)            |
| 189 | KLC2     | mmu-miR-762     | 9.93   | 32  | mmu-miR-762 (KLC2)            |
| 41  | KLC3     | mmu-miR-16*     | 293.00 | 293 | mmu-miR-16* (KLC3)            |
| 30  | KLC4     | mmu-miR-138*    | 51.00  | 51  | mmu-miR-138* (KLC4)           |
| 182 | KLC4     | mmu-miR-709     | 21.31  | 132 | mmu-miR-709 (KLC4)            |
| 195 | RILP     | mmu-miR-92a     | 3.00   | 3   | mmu-miR-92a (RILP)            |
| 13  | SAR1B    | mmu-miR-106a    | 17.12  | 73  | mmu-miR-106a (SAR1B)          |
| 43  | SAR1B    | mmu-miR-17      | 33.69  | 130 | mmu-miR-17 (SAR1B)            |
| 75  | SAR1B    | mmu-miR-20a     | 37.65  | 154 | mmu-miR-20a (SAR1B)           |

|     |        |              |        |     |                       |
|-----|--------|--------------|--------|-----|-----------------------|
| 197 | SAR1B  | mmu-miR-93   | 46.21  | 214 | mmu-miR-93 (SAR1B)    |
| 44  | SEC24C | mmu-miR-181a | 54.06  | 255 | mmu-miR-181a (SEC24C) |
| 45  | SEC24C | mmu-miR-181b | 27.76  | 109 | mmu-miR-181b (SEC24C) |
| 189 | SEC24C | mmu-miR-762  | 31.44  | 198 | mmu-miR-762 (SEC24C)  |
| 12  | SH3GL2 | mmu-miR-103  | 393.00 | 393 | mmu-miR-103 (SH3GL2)  |
| 42  | SH3GL2 | mmu-miR-16   | 57.75  | 304 | mmu-miR-16 (SH3GL2)   |
| 30  | SPTBN2 | mmu-miR-138* | 34.00  | 34  | mmu-miR-138* (SPTBN2) |
| 40  | SPTBN2 | mmu-miR-15b  | 40.57  | 191 | mmu-miR-15b (SPTBN2)  |
| 42  | SPTBN2 | mmu-miR-16   | 48.10  | 243 | mmu-miR-16 (SPTBN2)   |

| Pathway ID | Adjusted P-value | Pathway Name             |                 |                |                        |
|------------|------------------|--------------------------|-----------------|----------------|------------------------|
| 439        | 0.020979         | ST_INTERLEUKIN_4_PATHWAY |                 |                |                        |
| ASSAY ID   | Entrez Gene ID   | miRNA Name               | miRNApath Score | miRNApath Rank | miRNA - Gene           |
| 12         | AKT1             | mmu-miR-103              | 213.00          | 213            | mmu-miR-103 (AKT1)     |
| 195        | AKT1             | mmu-miR-92a              | 291.00          | 291            | mmu-miR-92a (AKT1)     |
| 40         | AKT3             | mmu-miR-15b              | 5.09            | 4              | mmu-miR-15b (AKT3)     |
| 42         | AKT3             | mmu-miR-16               | 5.29            | 6              | mmu-miR-16 (AKT3)      |
| 43         | AKT3             | mmu-miR-17               | 51.94           | 245            | mmu-miR-17 (AKT3)      |
| 44         | AKT3             | mmu-miR-181a             | 27.81           | 108            | mmu-miR-181a (AKT3)    |
| 45         | AKT3             | mmu-miR-181b             | 35.97           | 155            | mmu-miR-181b (AKT3)    |
| 75         | AKT3             | mmu-miR-20a              | 96.96           | 429            | mmu-miR-20a (AKT3)     |
| 197        | AKT3             | mmu-miR-93               | 44.26           | 201            | mmu-miR-93 (AKT3)      |
| 125        | GRB2             | mmu-miR-3473a            | 91.00           | 91             | mmu-miR-3473a (GRB2)   |
| 137        | GRB2             | mmu-miR-466f-3p          | 16.95           | 73             | mmu-miR-466f-3p (GRB2) |
| 148        | GRB2             | mmu-miR-467f             | 9.05            | 21             | mmu-miR-467f (GRB2)    |
| 12         | IARS             | mmu-miR-103              | 352.00          | 352            | mmu-miR-103 (IARS)     |
| 40         | IARS             | mmu-miR-15b              | 72.73           | 378            | mmu-miR-15b (IARS)     |
| 103        | IARS             | mmu-miR-297a             | 4.63            | 20             | mmu-miR-297a (IARS)    |
| 182        | IL2RG            | mmu-miR-709              | 10.33           | 30             | mmu-miR-709 (IL2RG)    |
| 94         | IL4              | mmu-miR-24               | 193.50          | 193.5          | mmu-miR-24 (IL4)       |
| 13         | JAK1             | mmu-miR-106a             | 14.51           | 57             | mmu-miR-106a (JAK1)    |
| 43         | JAK1             | mmu-miR-17               | 42.24           | 185            | mmu-miR-17 (JAK1)      |
| 75         | JAK1             | mmu-miR-20a              | 34.05           | 133            | mmu-miR-20a (JAK1)     |
| 125        | JAK1             | mmu-miR-3473a            | 645.00          | 645            | mmu-miR-3473a (JAK1)   |
| 73         | NROB2            | mmu-miR-19b              | 464.50          | 464.5          | mmu-miR-19b (NROB2)    |
| 46         | PIK3CA           | mmu-miR-1892             | 1.46            | 1              | mmu-miR-1892 (PIK3CA)  |
| 162        | PIK3CA           | mmu-miR-669b             | 8.57            | 42             | mmu-miR-669b (PIK3CA)  |
| 44         | RPS6KB1          | mmu-miR-181a             | 54.11           | 256            | mmu-miR-181a (RPS6KB1) |
| 45         | RPS6KB1          | mmu-miR-181b             | 34.65           | 148            | mmu-miR-181b (RPS6KB1) |
| 172        | SHC1             | mmu-miR-674              | 16.28           | 96             | mmu-miR-674 (SHC1)     |
| 43         | SOS1             | mmu-miR-17               | 56.08           | 269            | mmu-miR-17 (SOS1)      |

|     |      |              |        |     |                     |
|-----|------|--------------|--------|-----|---------------------|
| 44  | SOS1 | mmu-miR-181a | 58.55  | 279 | mmu-miR-181a (SOS1) |
| 45  | SOS1 | mmu-miR-181b | 36.15  | 156 | mmu-miR-181b (SOS1) |
| 75  | SOS1 | mmu-miR-20a  | 32.95  | 128 | mmu-miR-20a (SOS1)  |
| 197 | SOS1 | mmu-miR-93   | 27.84  | 101 | mmu-miR-93 (SOS1)   |
| 30  | SOS2 | mmu-miR-138* | 227.00 | 227 | mmu-miR-138* (SOS2) |
| 40  | SOS2 | mmu-miR-15b  | 70.01  | 360 | mmu-miR-15b (SOS2)  |
| 42  | SOS2 | mmu-miR-16   | 87.35  | 436 | mmu-miR-16 (SOS2)   |
| 1   | TYK2 | mmu-let-7a   | 8.27   | 12  | mmu-let-7a (TYK2)   |
| 3   | TYK2 | mmu-let-7b   | 9.28   | 22  | mmu-let-7b (TYK2)   |
| 4   | TYK2 | mmu-let-7c   | 8.28   | 13  | mmu-let-7c (TYK2)   |
| 6   | TYK2 | mmu-let-7d   | 4.99   | 15  | mmu-let-7d (TYK2)   |
| 7   | TYK2 | mmu-let-7e   | 7.03   | 15  | mmu-let-7e (TYK2)   |
| 10  | TYK2 | mmu-let-7i   | 8.61   | 17  | mmu-let-7i (TYK2)   |

| Pathway ID | Adjusted P-value | Pathway Name                                      |                 |                |                       |
|------------|------------------|---------------------------------------------------|-----------------|----------------|-----------------------|
| 963        | 0.021978         | REACTOME_PROCESSING_OF_CAPPED_INTRONLESS_PRE_MRNA |                 |                |                       |
| ASSAY ID   | Entrez Gene ID   | miRNA Name                                        | miRNApath Score | miRNApath Rank | miRNA - Gene          |
| 1          | CLP1             | mmu-let-7a                                        | 32.64           | 165            | mmu-let-7a (CLP1)     |
| 3          | CLP1             | mmu-let-7b                                        | 28.36           | 140            | mmu-let-7b (CLP1)     |
| 4          | CLP1             | mmu-let-7c                                        | 33.67           | 178            | mmu-let-7c (CLP1)     |
| 6          | CLP1             | mmu-let-7d                                        | 6.84            | 24             | mmu-let-7d (CLP1)     |
| 7          | CLP1             | mmu-let-7e                                        | 38.05           | 202            | mmu-let-7e (CLP1)     |
| 10         | CLP1             | mmu-let-7i                                        | 14.13           | 40             | mmu-let-7i (CLP1)     |
| 30         | CLP1             | mmu-miR-138*                                      | 144.00          | 144            | mmu-miR-138* (CLP1)   |
| 12         | CPSF1            | mmu-miR-103                                       | 30.00           | 30             | mmu-miR-103 (CPSF1)   |
| 96         | CPSF2            | mmu-miR-26a                                       | 46.95           | 241            | mmu-miR-26a (CPSF2)   |
| 103        | CPSF2            | mmu-miR-297a                                      | 6.03            | 32             | mmu-miR-297a (CPSF2)  |
| 40         | CPSF7            | mmu-miR-15b                                       | 43.96           | 209            | mmu-miR-15b (CPSF7)   |
| 42         | CPSF7            | mmu-miR-16                                        | 41.93           | 203            | mmu-miR-16 (CPSF7)    |
| 59         | CPSF7            | mmu-miR-1935                                      | 30.20           | 65             | mmu-miR-1935 (CPSF7)  |
| 172        | CPSF7            | mmu-miR-674                                       | 10.01           | 51             | mmu-miR-674 (CPSF7)   |
| 189        | CPSF7            | mmu-miR-762                                       | 22.65           | 135            | mmu-miR-762 (CPSF7)   |
| 94         | LSM10            | mmu-miR-24                                        | 141.00          | 141            | mmu-miR-24 (LSM10)    |
| 195        | LSM11            | mmu-miR-92a                                       | 305.00          | 305            | mmu-miR-92a (LSM11)   |
| 30         | NCBP1            | mmu-miR-138*                                      | 17.00           | 17             | mmu-miR-138* (NCBP1)  |
| 44         | NCBP1            | mmu-miR-181a                                      | 7.02            | 11             | mmu-miR-181a (NCBP1)  |
| 45         | NCBP1            | mmu-miR-181b                                      | 20.95           | 77             | mmu-miR-181b (NCBP1)  |
| 174        | NCBP1            | mmu-miR-690                                       | 9.92            | 55.5           | mmu-miR-690 (NCBP1)   |
| 13         | PAPOLA           | mmu-miR-106a                                      | 17.50           | 75             | mmu-miR-106a (PAPOLA) |
| 43         | PAPOLA           | mmu-miR-17                                        | 81.96           | 376            | mmu-miR-17 (PAPOLA)   |
| 75         | PAPOLA           | mmu-miR-20a                                       | 39.39           | 164            | mmu-miR-20a (PAPOLA)  |

|     |        |              |       |     |                       |
|-----|--------|--------------|-------|-----|-----------------------|
| 103 | PAPOLA | mmu-miR-297a | 8.70  | 37  | mmu-miR-297a (PAPOLA) |
| 197 | PAPOLA | mmu-miR-93   | 59.27 | 282 | mmu-miR-93 (PAPOLA)   |
| 141 | PCF11  | mmu-miR-466h | 5.65  | 13  | mmu-miR-466h (PCF11)  |
| 143 | PCF11  | mmu-miR-466j | 4.09  | 12  | mmu-miR-466j (PCF11)  |

Pathway ID      Adjusted P-value      Pathway Name  
1025      0.021978      REACTOME\_PD1\_SIGNALING

| ASSAY ID | Entrez Gene ID | miRNA Name   | miRNApath Score | miRNApath Rank | miRNA - Gene        |
|----------|----------------|--------------|-----------------|----------------|---------------------|
| 43       | CD274          | mmu-miR-17   | 85.26           | 387            | mmu-miR-17 (CD274)  |
| 75       | CD274          | mmu-miR-20a  | 76.41           | 373            | mmu-miR-20a (CD274) |
| 197      | CD274          | mmu-miR-93   | 96.07           | 420            | mmu-miR-93 (CD274)  |
| 189      | CD3E           | mmu-miR-762  | 33.21           | 209            | mmu-miR-762 (CD3E)  |
| 44       | CD4            | mmu-miR-181a | 78.24           | 346            | mmu-miR-181a (CD4)  |
| 45       | CD4            | mmu-miR-181b | 61.50           | 290            | mmu-miR-181b (CD4)  |
| 94       | CSK            | mmu-miR-24   | 52.00           | 52             | mmu-miR-24 (CSK)    |
| 141      | LCK            | mmu-miR-466h | 14.47           | 71             | mmu-miR-466h (LCK)  |
